# Supplementary material for: Enantioselective synthesis of α-halo-α-alkylmalonates via phase-transfer catalytic α-alkylation
Source: Royal Society of Chemistry journal article supplement (doi:10.1039/c3ob42107d), 2013-11-29
Supplement: c3ob42107d.pdf [file c3ob42107d.pdf]

Supporting Information

## Enantioselective Synthesis of $\alpha$ -Halo- $\alpha$ -alkylmalonates via Phase-Transfer Catalytic $\alpha$ -Alkylation

Suckchang Hong,<sup>[a]</sup> Minsik Kim,<sup>[a]</sup> Myunggi Jung,<sup>[a]</sup> Min Woo Ha,<sup>[a]</sup> Myungmo Lee,<sup>[a]</sup>  
Yohan Park,<sup>[b]</sup> Mi-hyun Kim,<sup>[c]</sup> Taek-Soo Kim,<sup>[a]</sup> Jihoon Lee,<sup>[a]</sup>  
and Hyeung-geun Park\*<sup>[a]</sup>

<sup>[a]</sup> *Research Institute of Pharmaceutical Sciences and College of Pharmacy,  
Seoul National University, Seoul 151-742, Korea*

<sup>[b]</sup> *College of Pharmacy, Inje University, 607 Obang-dong,  
Gimhae, Gyeongnam 621-749, Korea*

<sup>[c]</sup> *College of Pharmacy, Gachon University, Incheon 406-799, Korea*

[hgpk@snu.ac.kr](mailto:hgpk@snu.ac.kr)

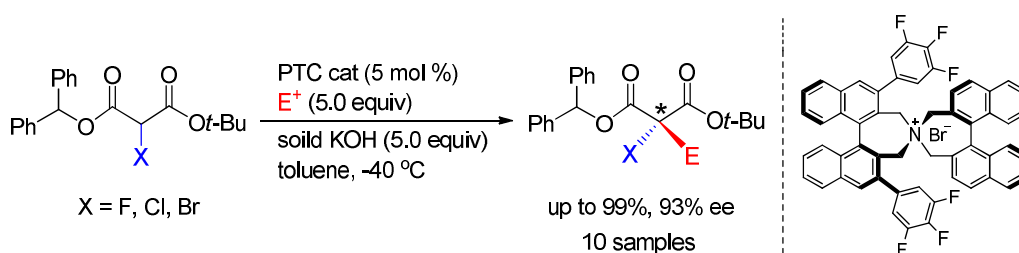

### Contents

|                                            |      |
|--------------------------------------------|------|
| $^1\text{H}$ & $^{13}\text{C}$ NMR Spectra | S-02 |
| Chiral HPLC analysis                       | S-21 |

# $^1\text{H}$ & $^{13}\text{C}$ NMR Spectra

$^1\text{H}$ -NMR of compound **9** (300 MHz)

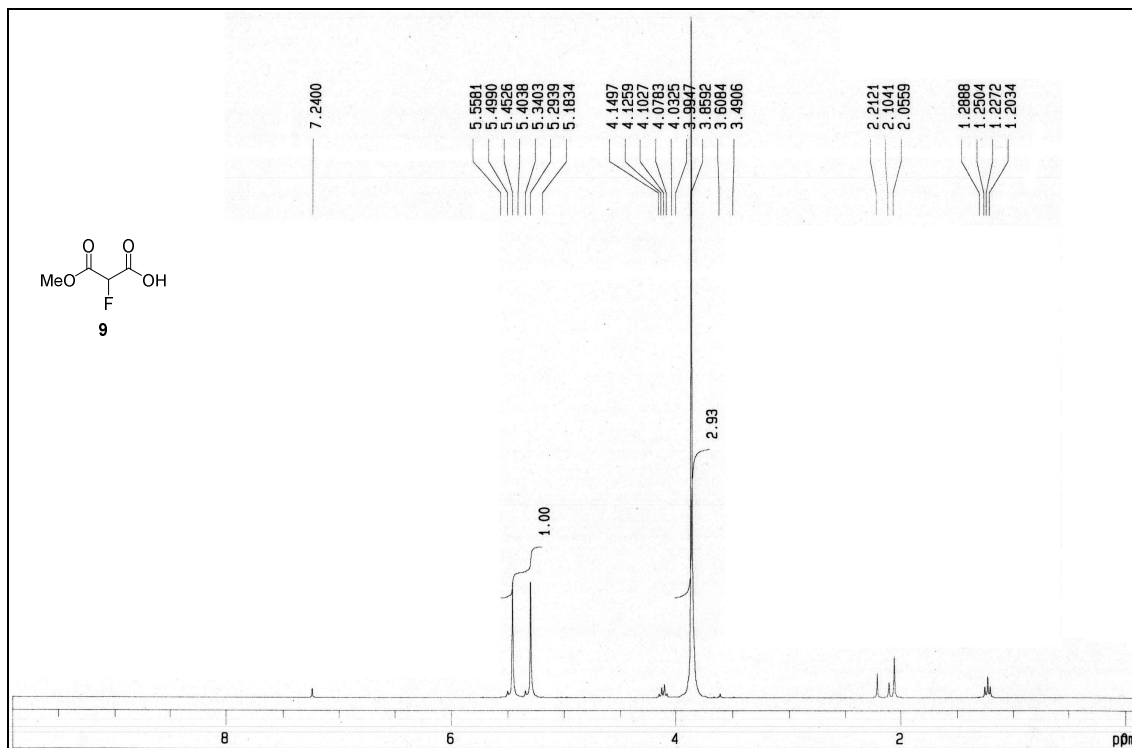

$^{13}\text{C}$ -NMR of compound **9** (100 MHz)

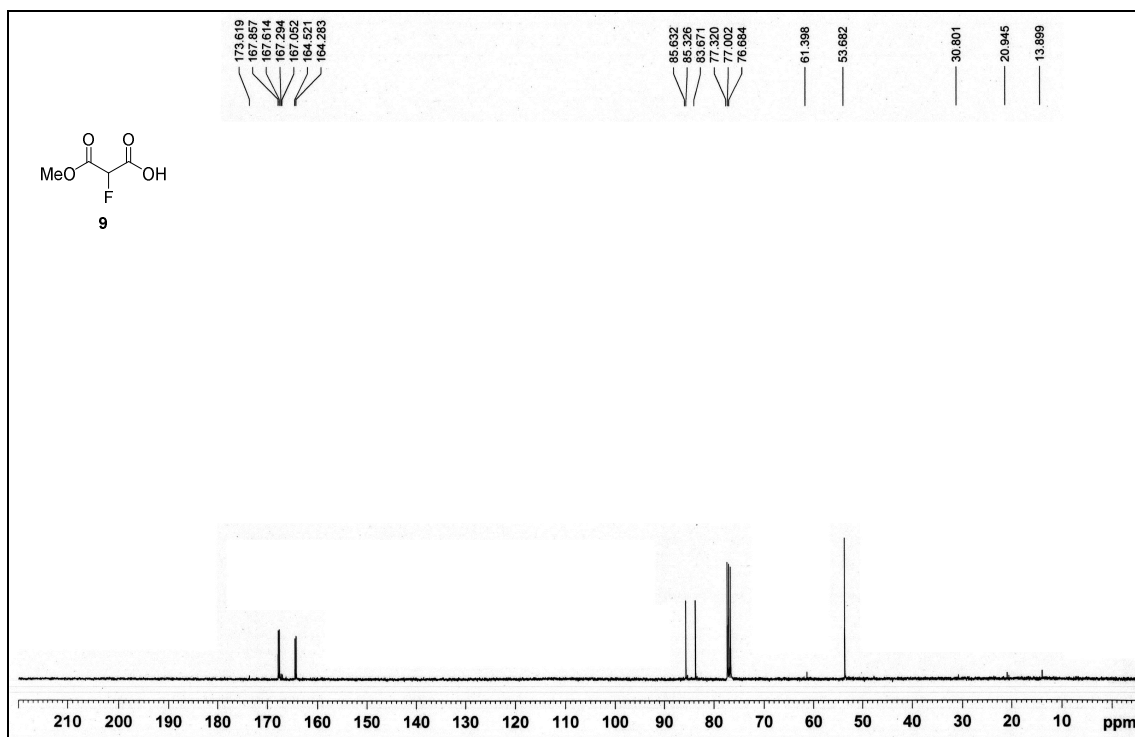

$^1\text{H}$ -NMR of compound **10** (300 MHz)

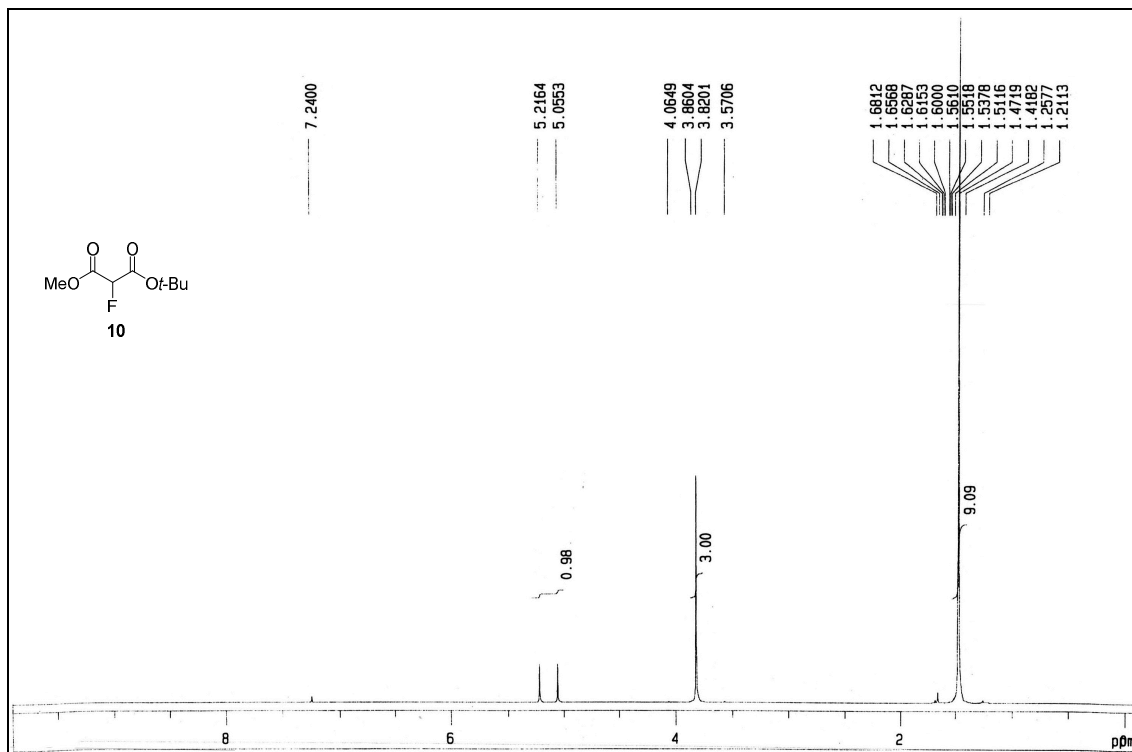

$^{13}\text{C}$ -NMR of compound **10** (100 MHz)

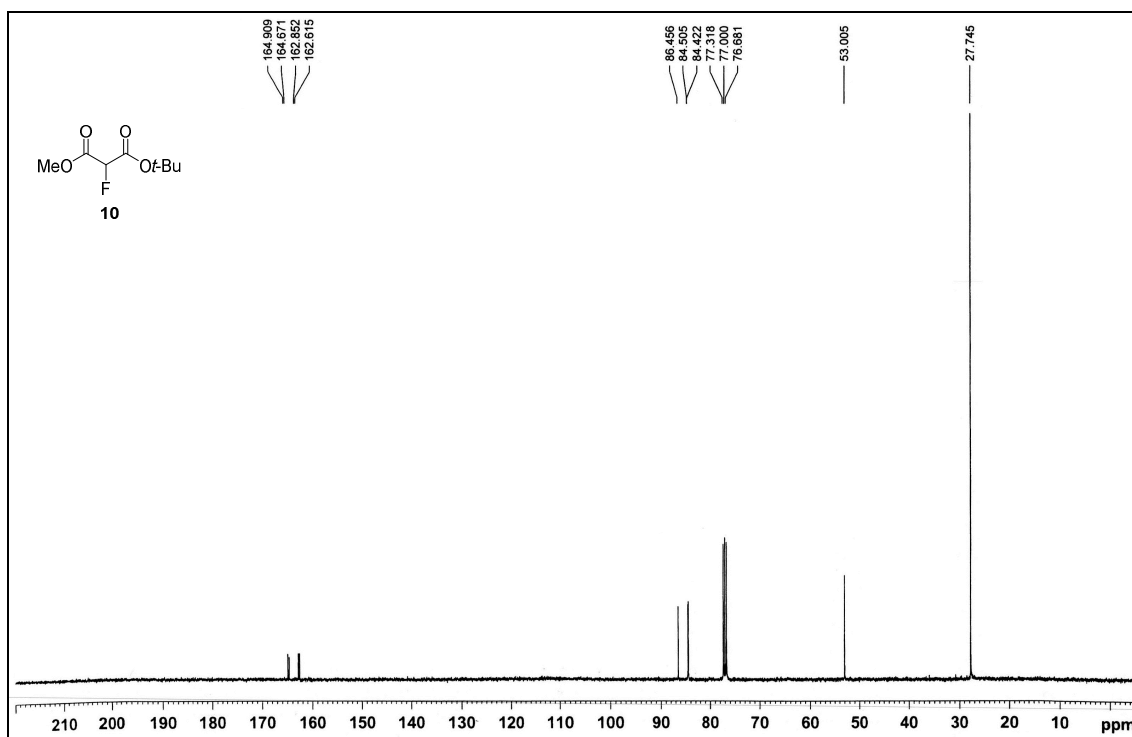

$^1\text{H}$ -NMR of compound **12** (300 MHz)

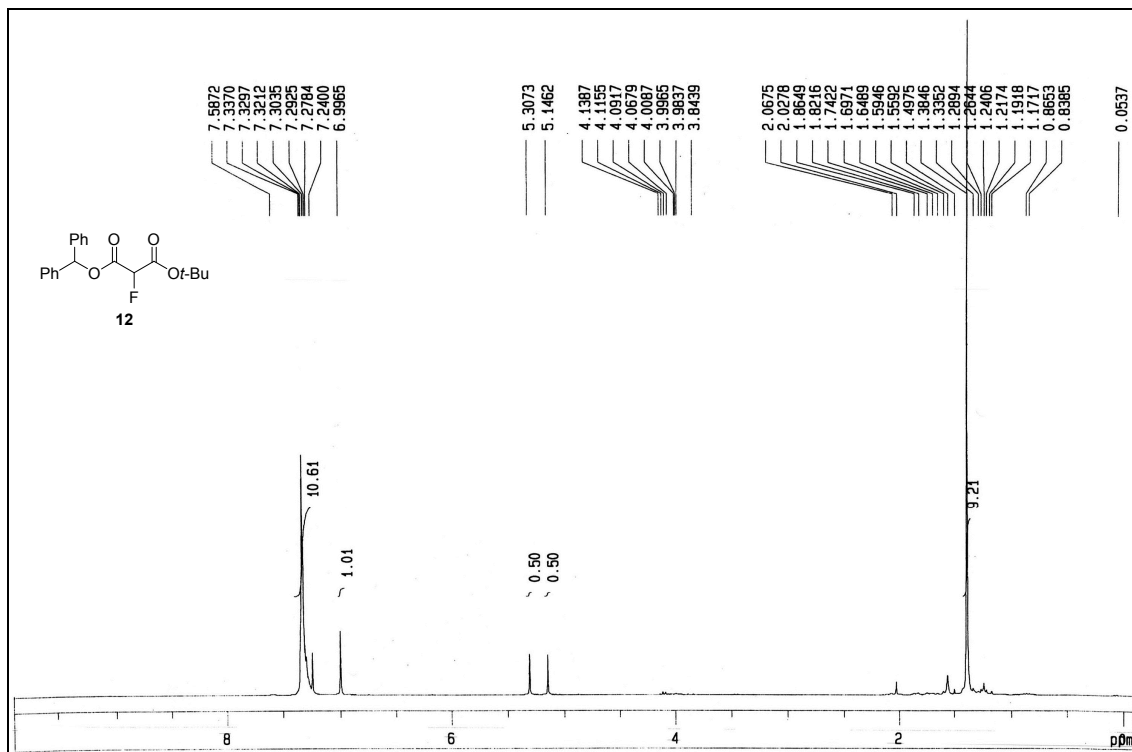

$^{13}\text{C}$ -NMR of compound **12** (100 MHz)

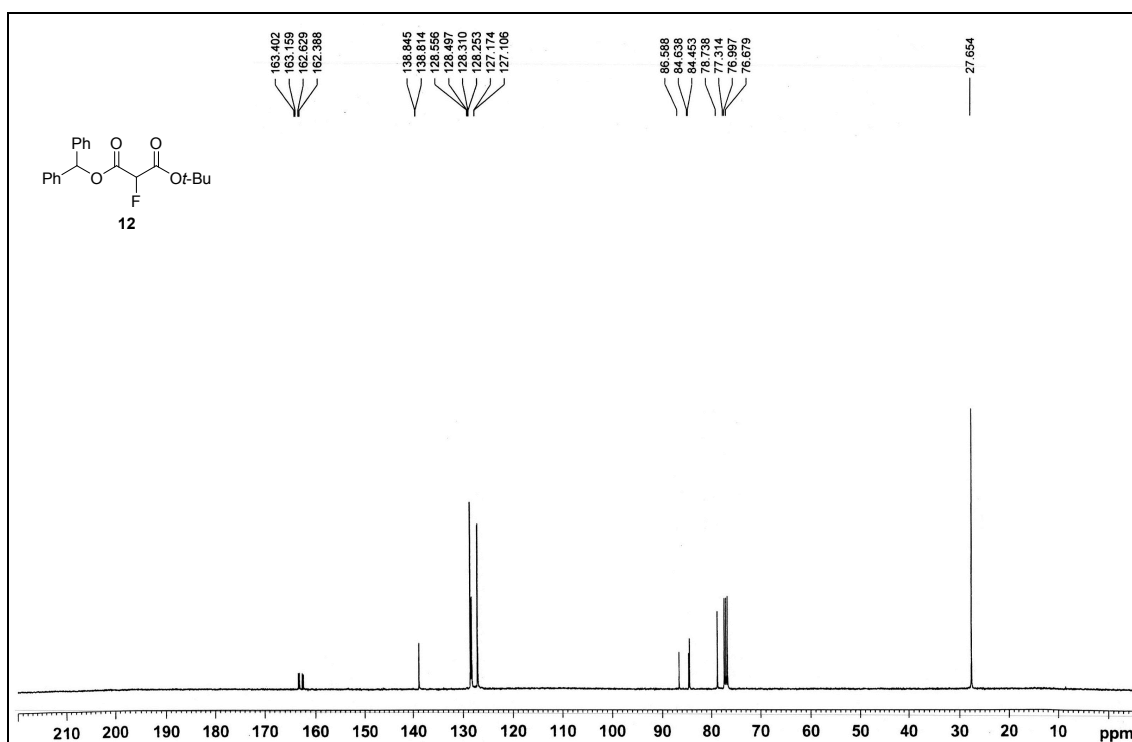



<sup>1</sup>H-NMR of compound **14** (300 MHz)

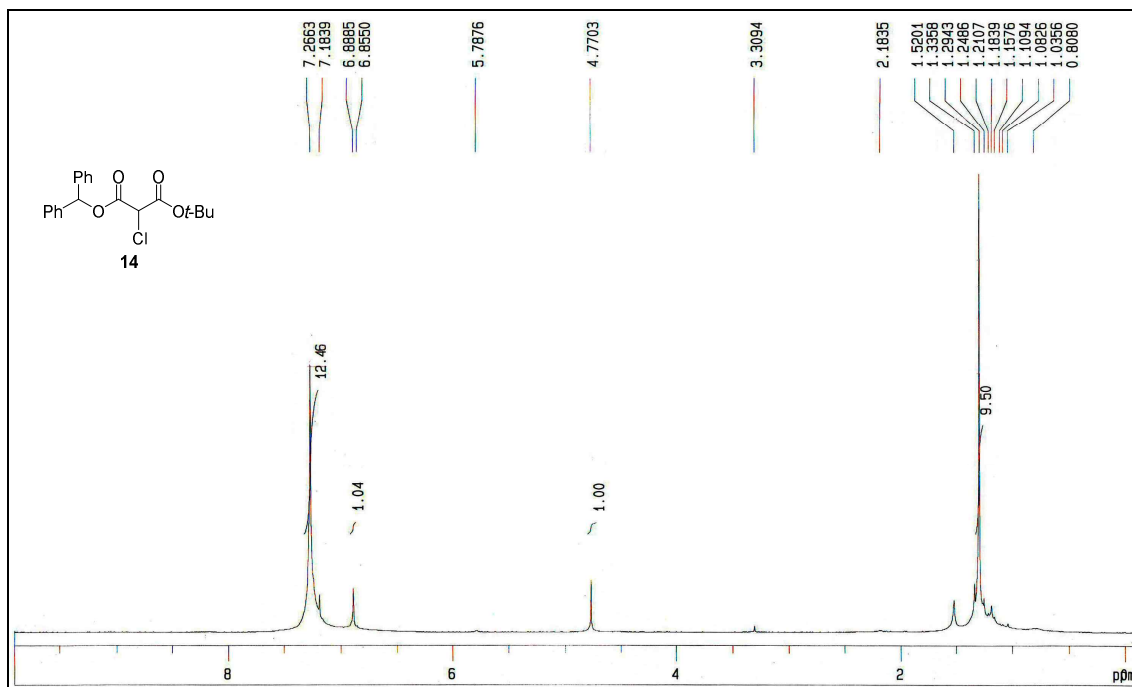

<sup>13</sup>C-NMR of compound **14** (125 MHz)

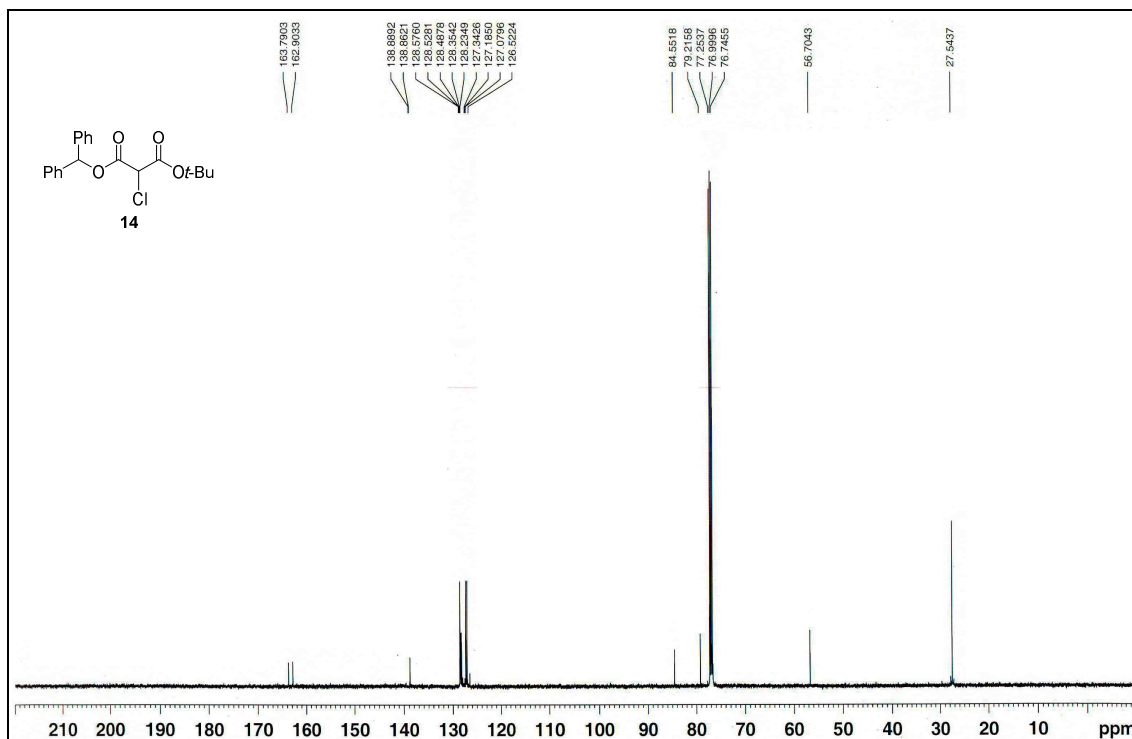

<sup>1</sup>H-NMR of compound **15** (300 MHz)

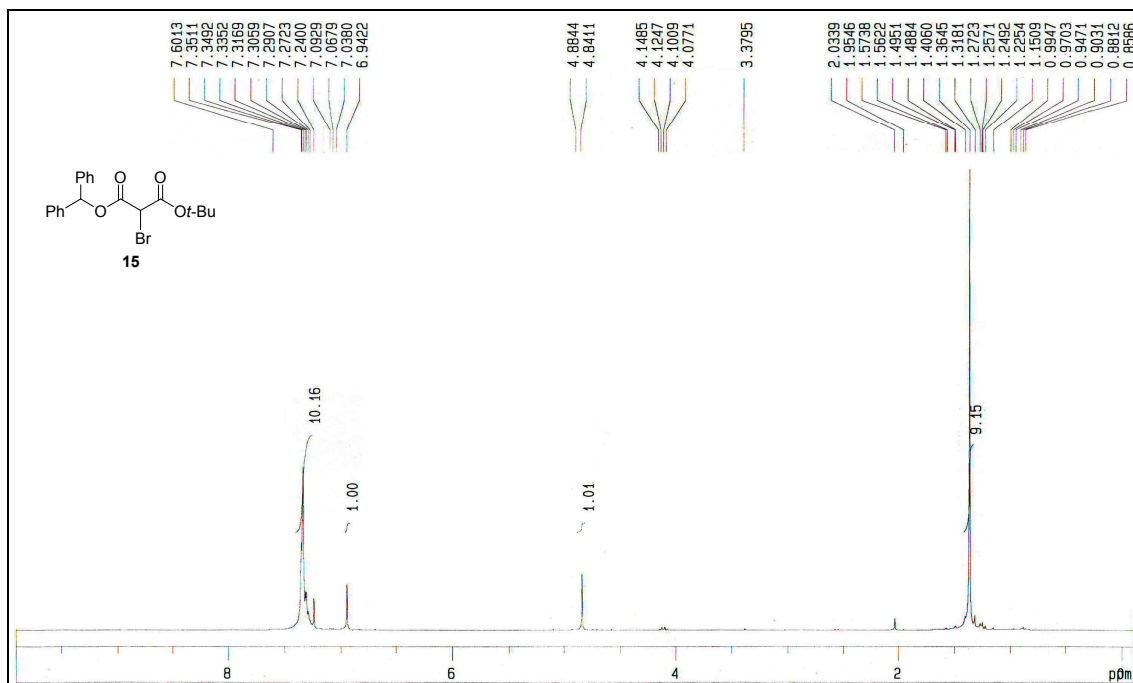

<sup>13</sup>C-NMR of compound **15** (125 MHz)

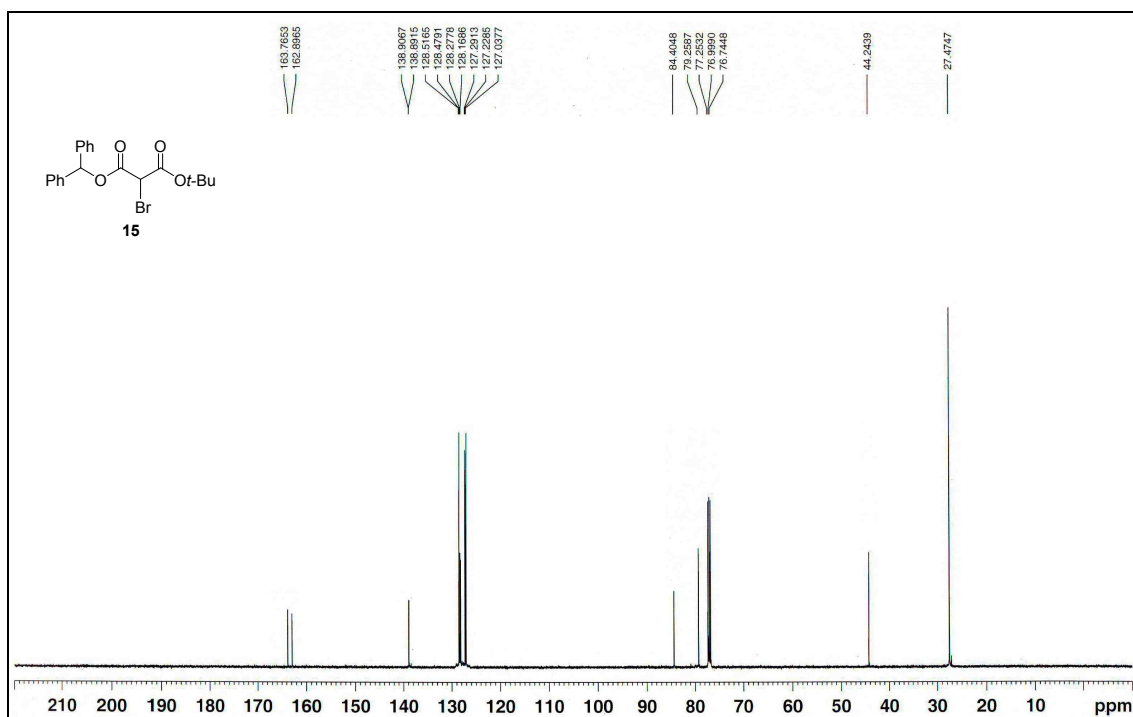

<sup>1</sup>H-NMR of compound **12a** (300 MHz)

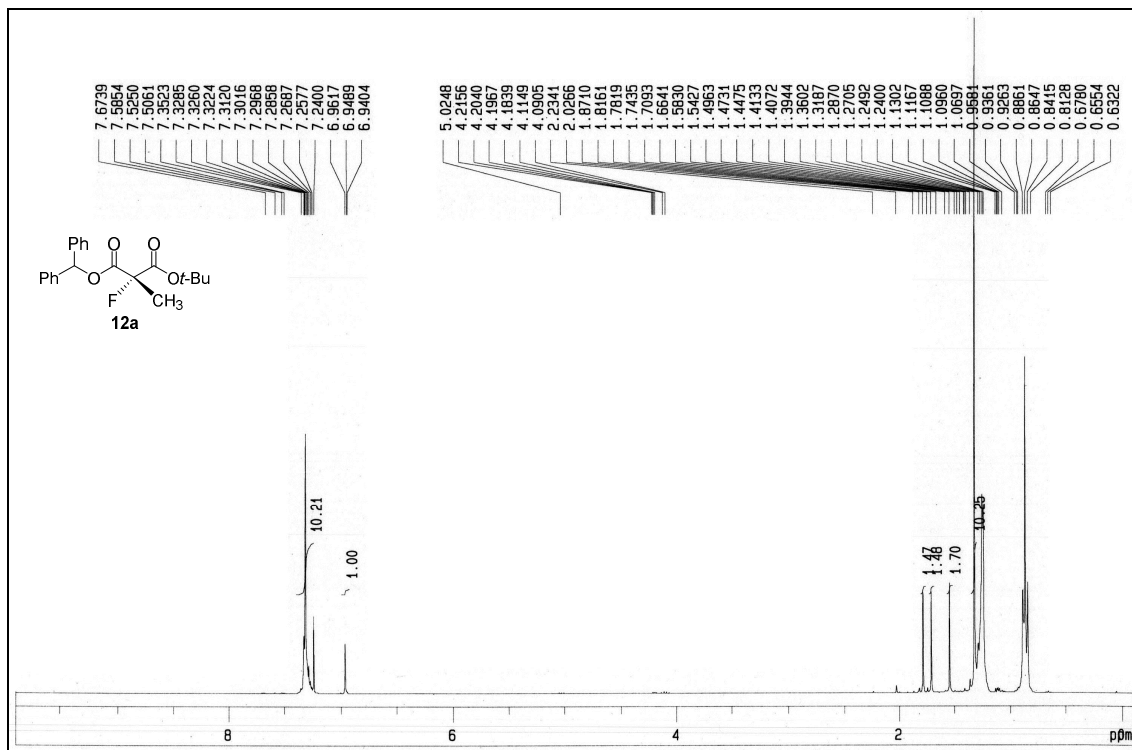

<sup>13</sup>C-NMR of compound **12a** (100 MHz)

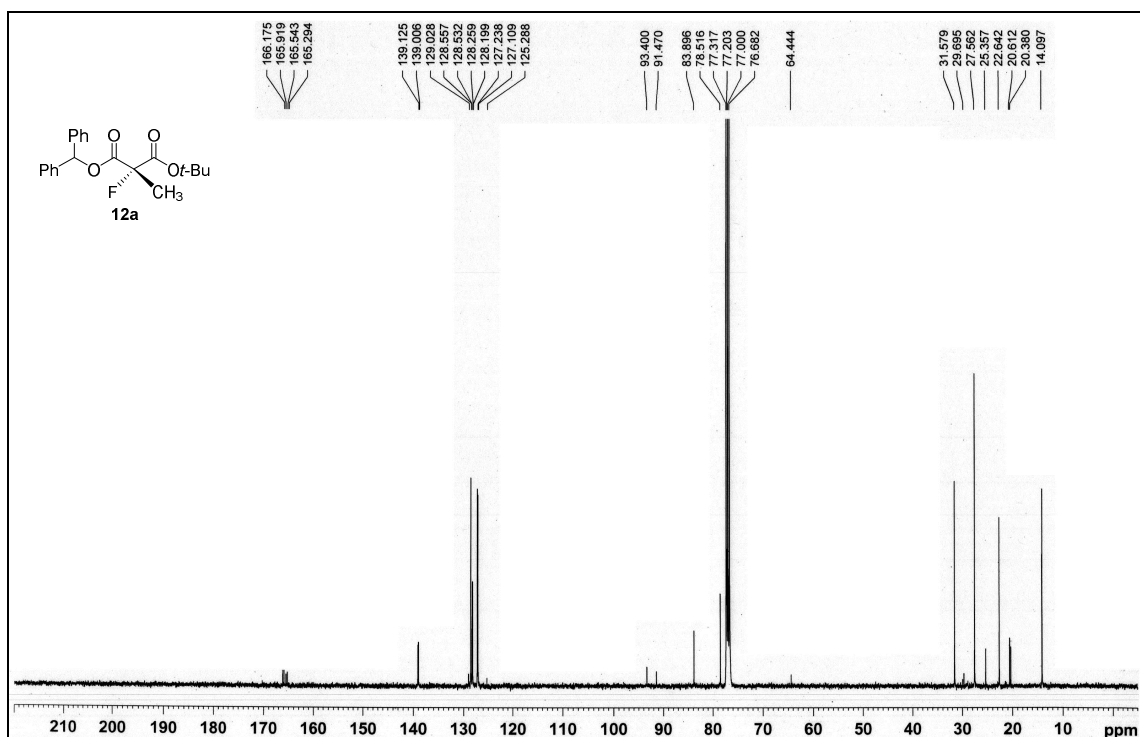

<sup>1</sup>H-NMR of compound **12b** (300 MHz)

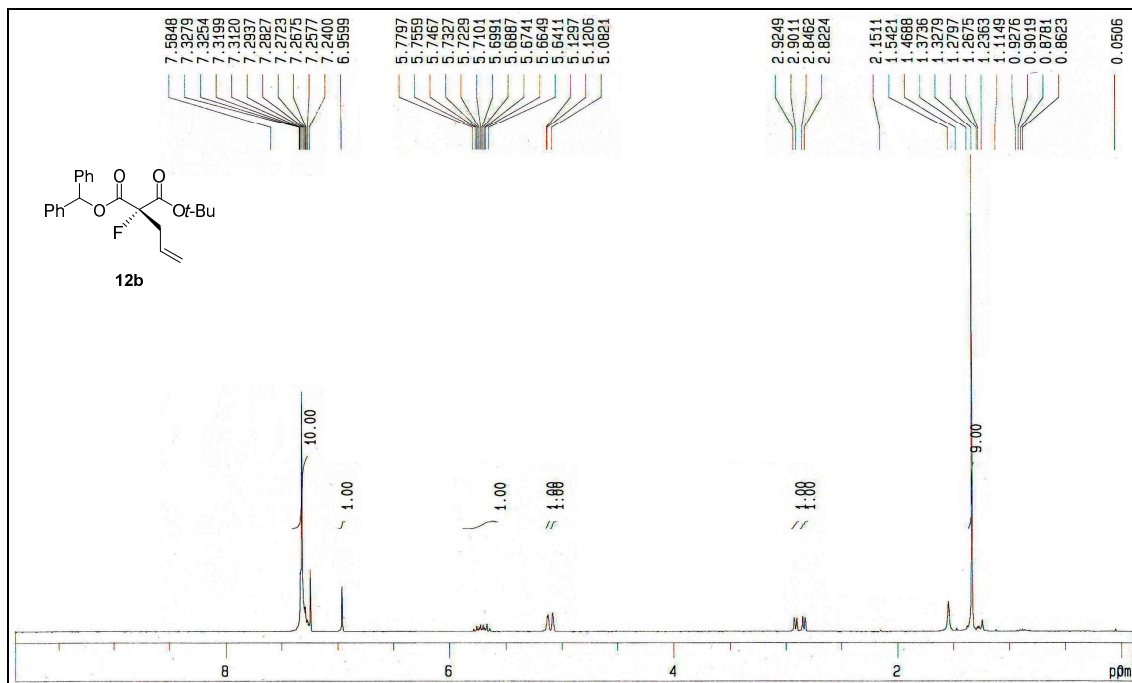

<sup>13</sup>C-NMR of compound **12b** (100 MHz)

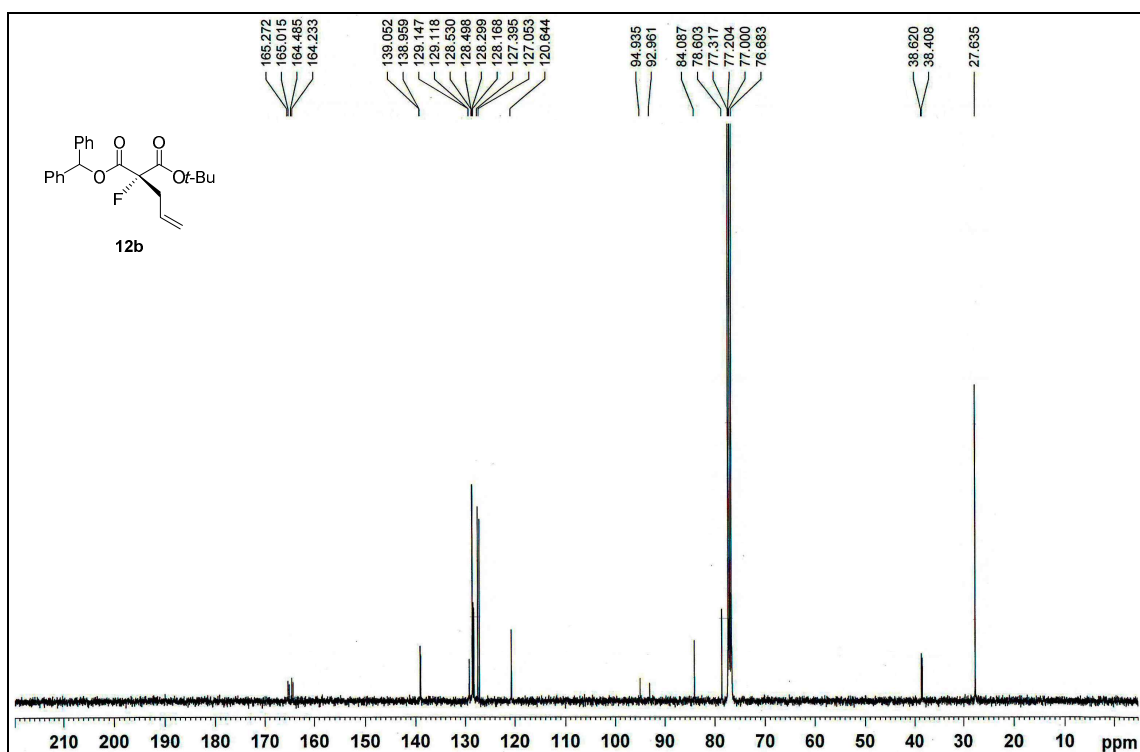

<sup>1</sup>H-NMR of compound **14b** (300 MHz)

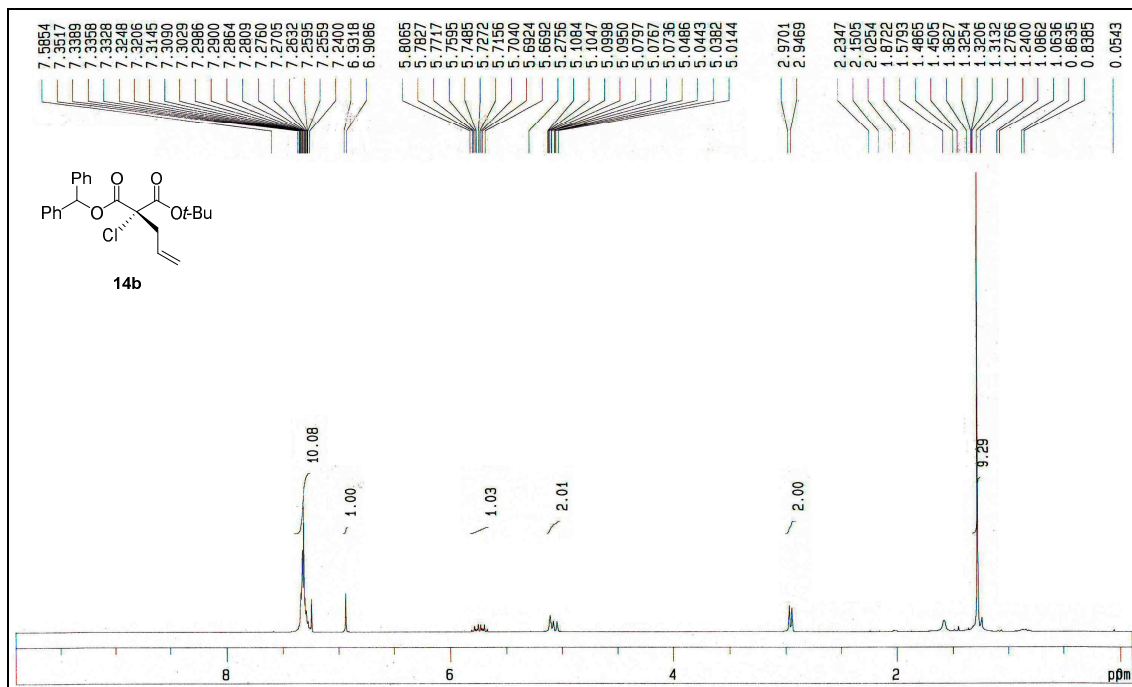

<sup>13</sup>C-NMR of compound **14b** (100 MHz)

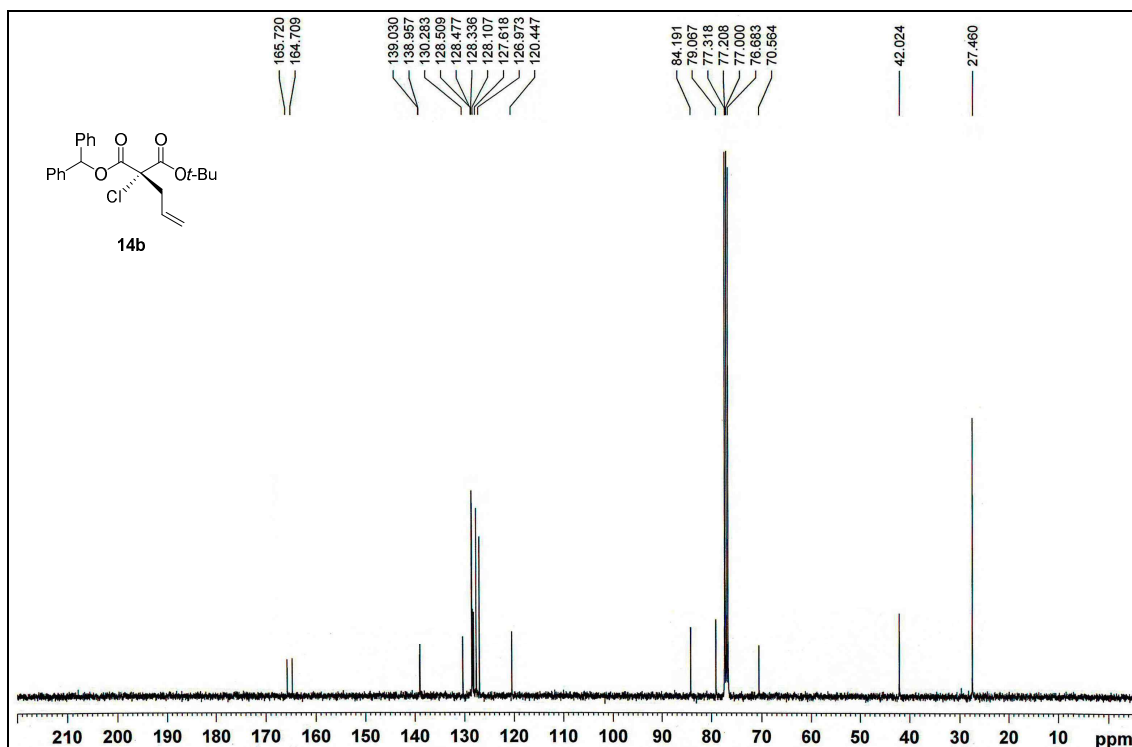

$^1\text{H}$ -NMR of compound **15b** (300 MHz)

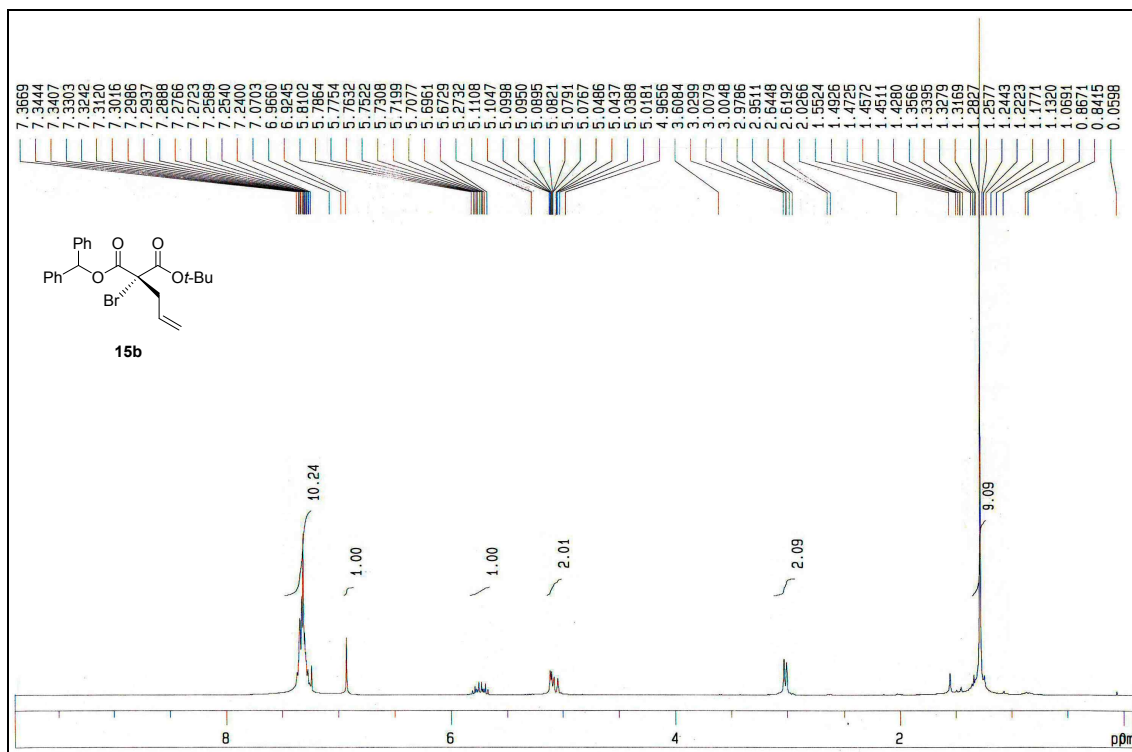

$^{13}\text{C}$ -NMR of compound **15b** (100 MHz)

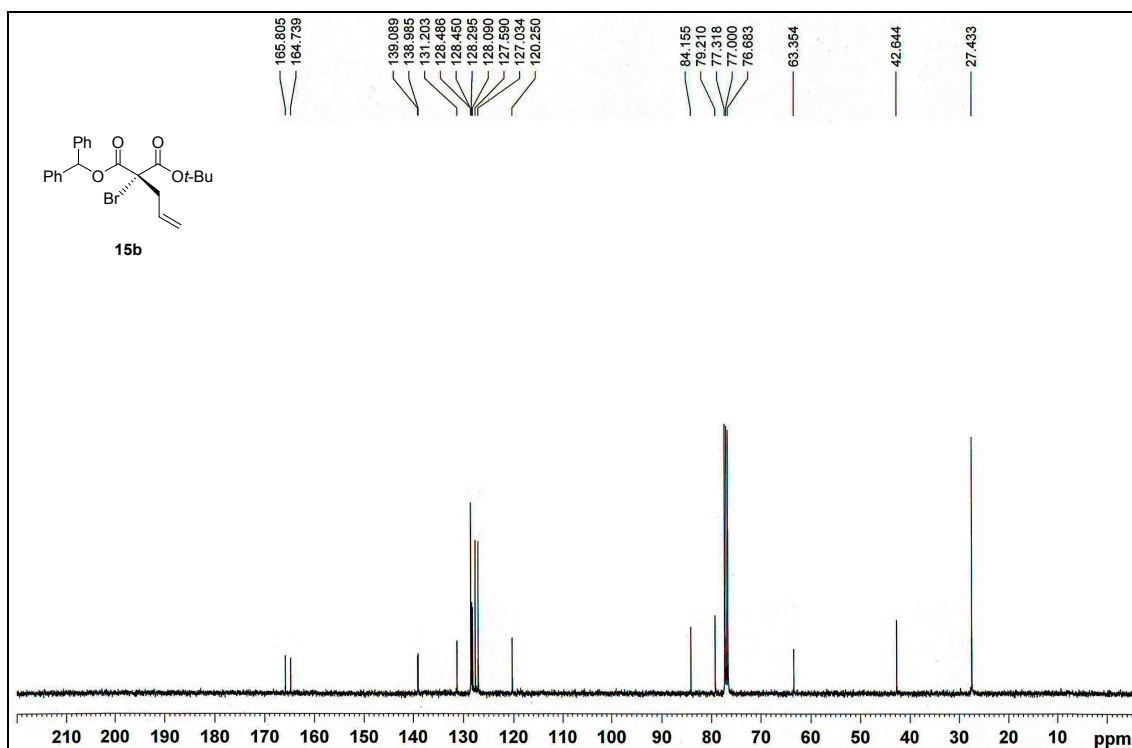

$^1\text{H}$ -NMR of compound **12c** (400 MHz)

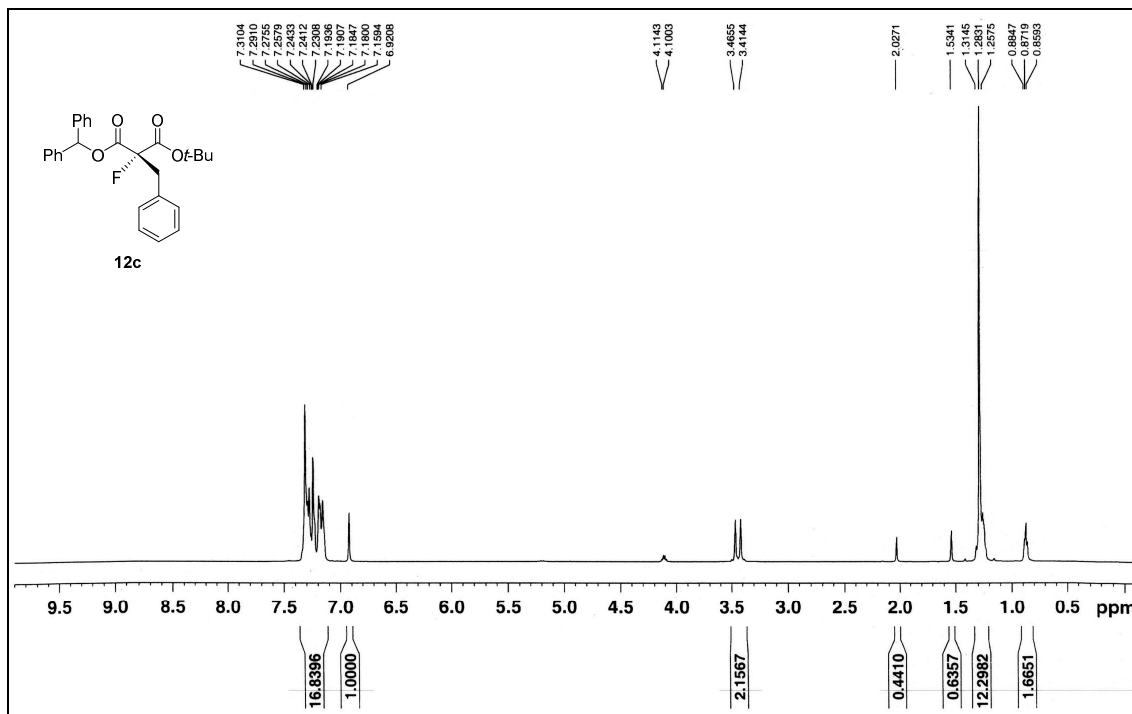

$^{13}\text{C}$ -NMR of compound **12c** (100 MHz)

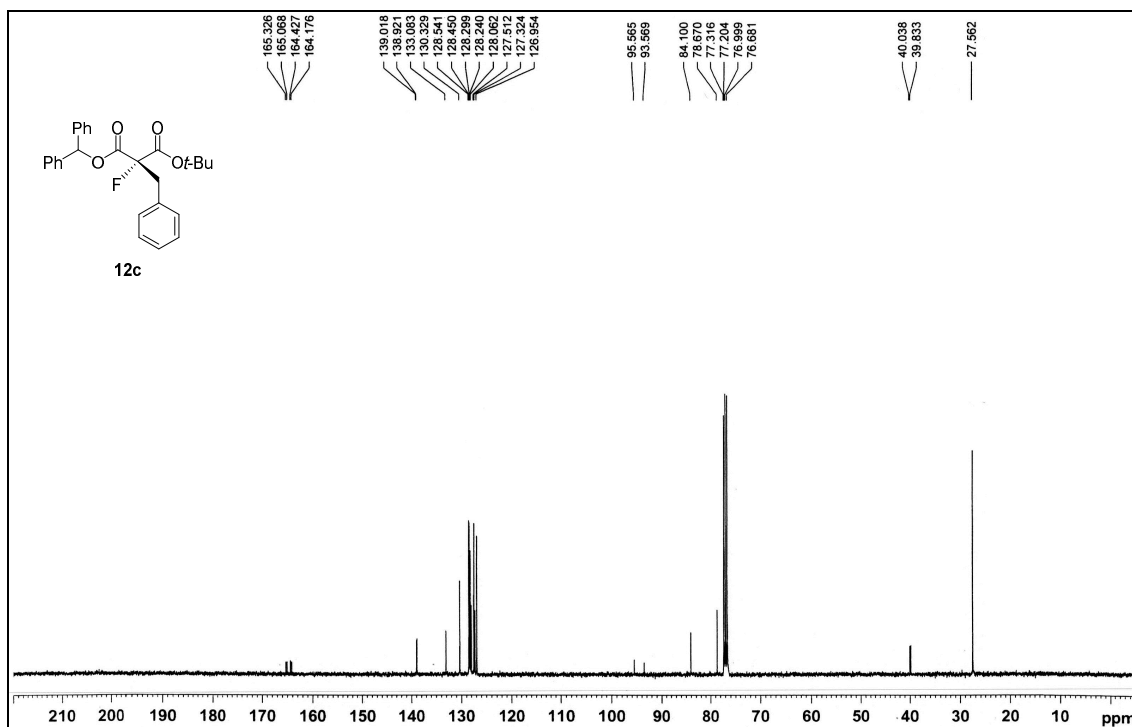



$^1\text{H}$ -NMR of compound **14c** (300 MHz)

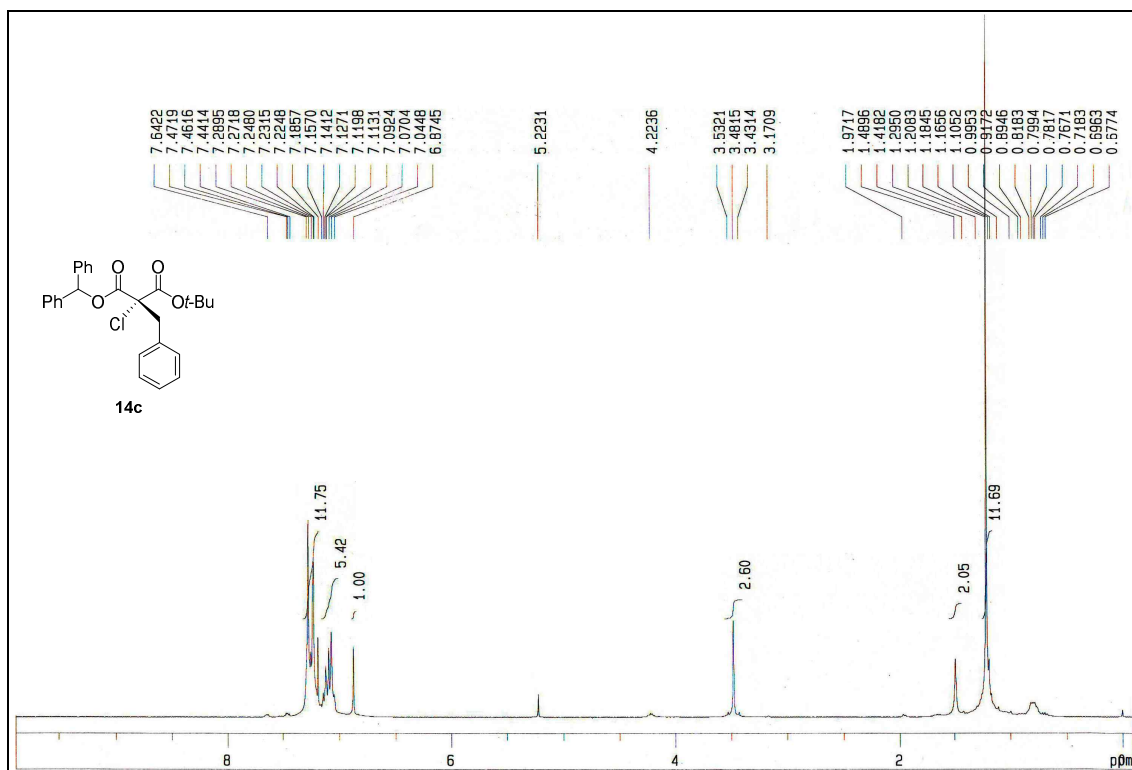

$^{13}\text{C}$ -NMR of compound **14c** (100 MHz)

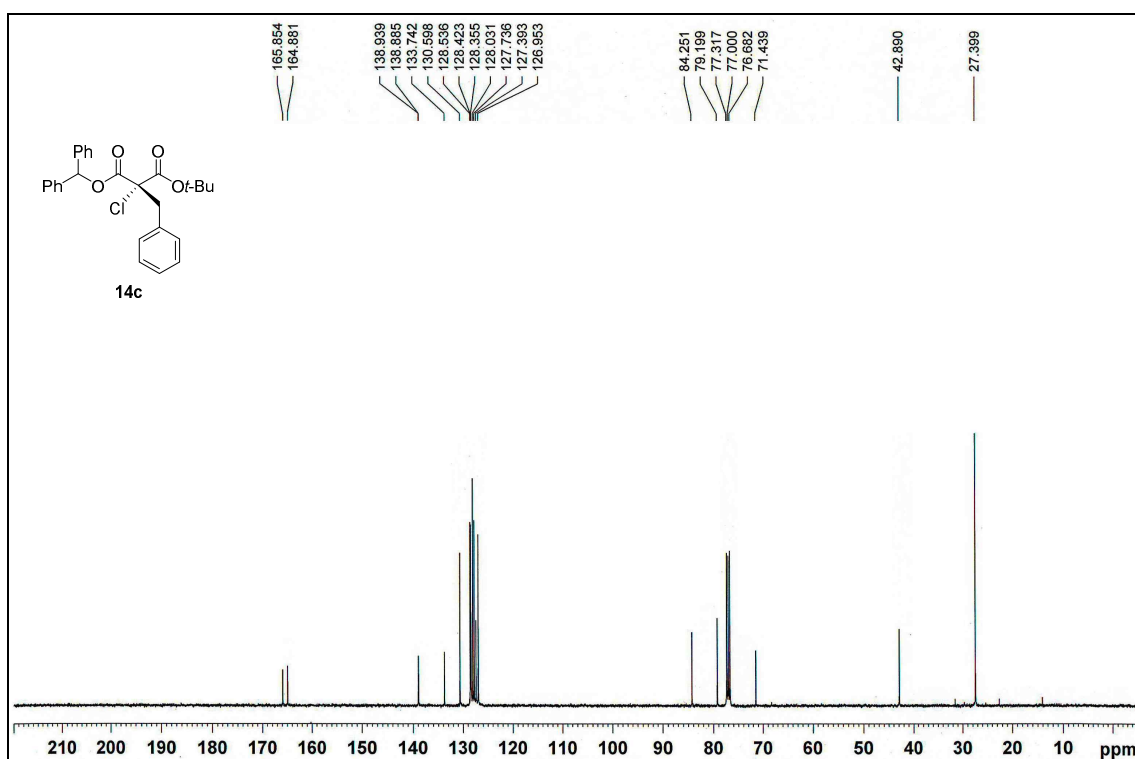



<sup>1</sup>H-NMR of compound **15c** (300 MHz)

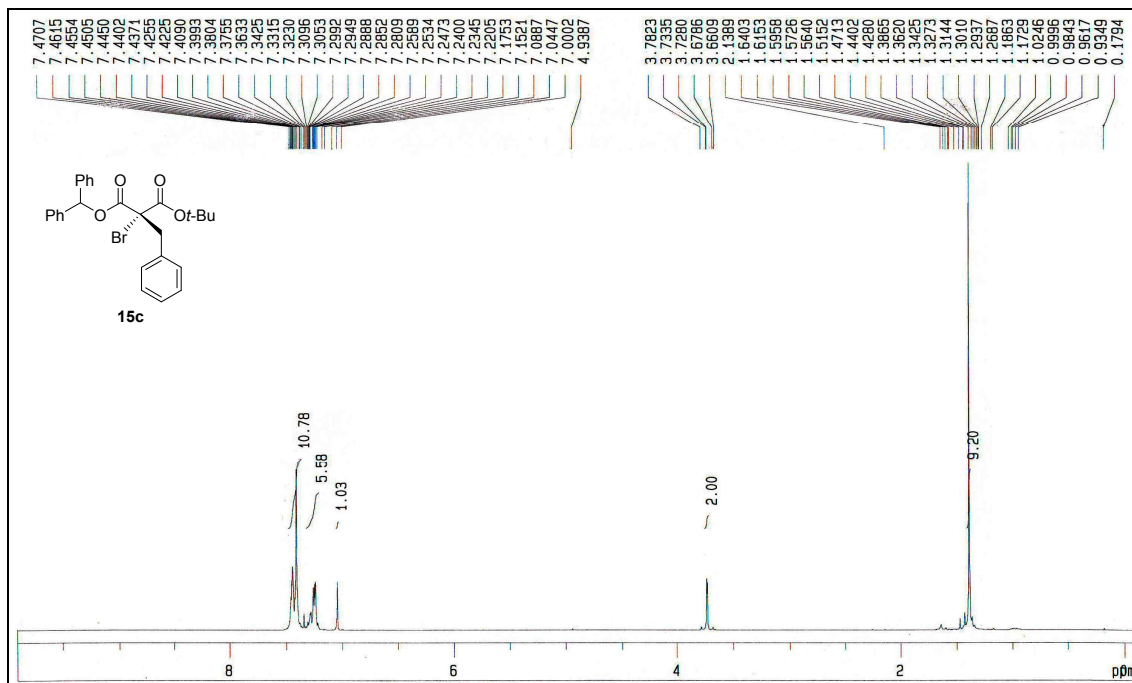

<sup>13</sup>C-NMR of compound **15c** (100 MHz)

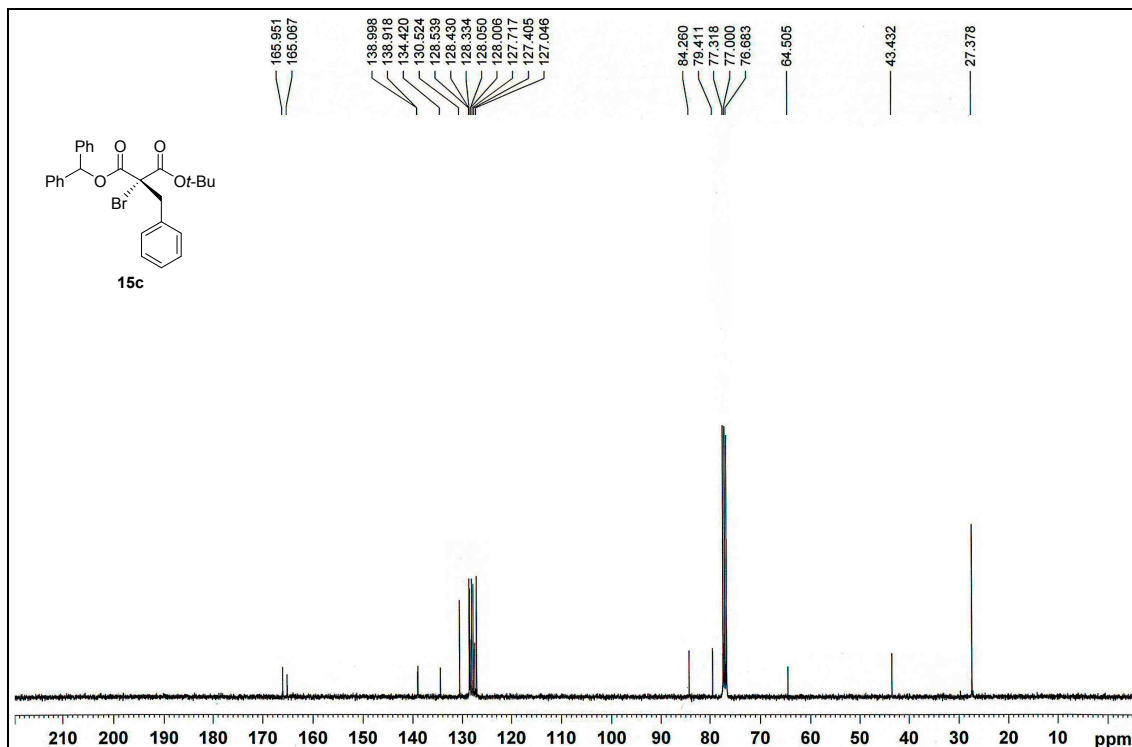

<sup>1</sup>H-NMR of compound **12d** (300 MHz)

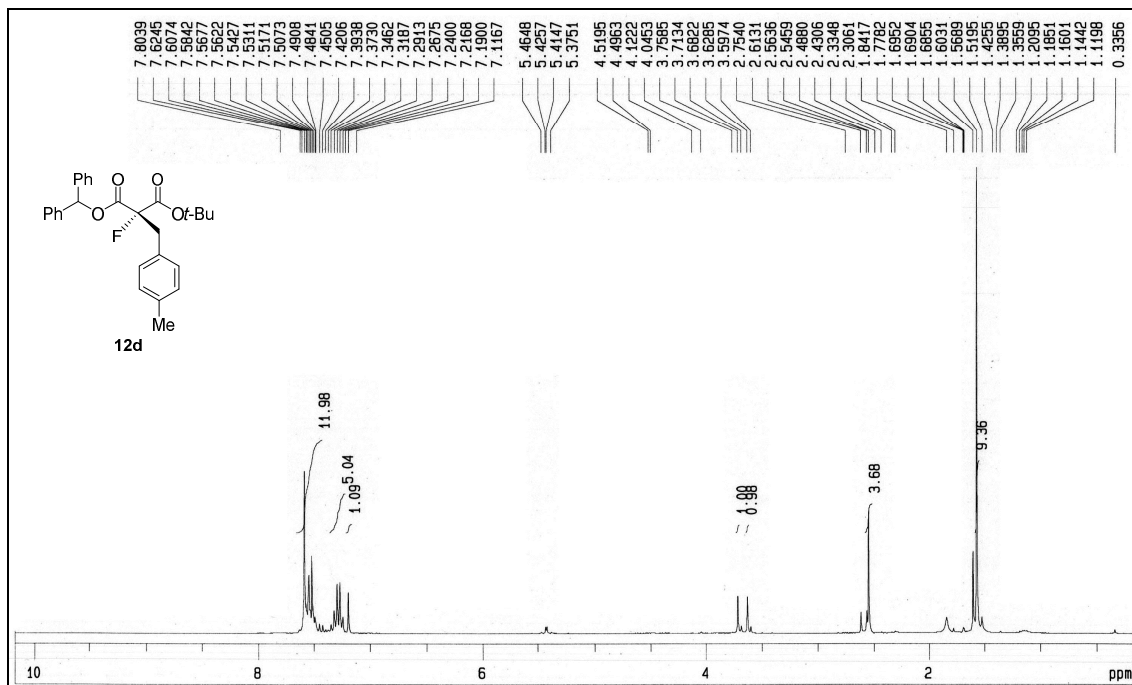

<sup>13</sup>C-NMR of compound **12d** (100 MHz)

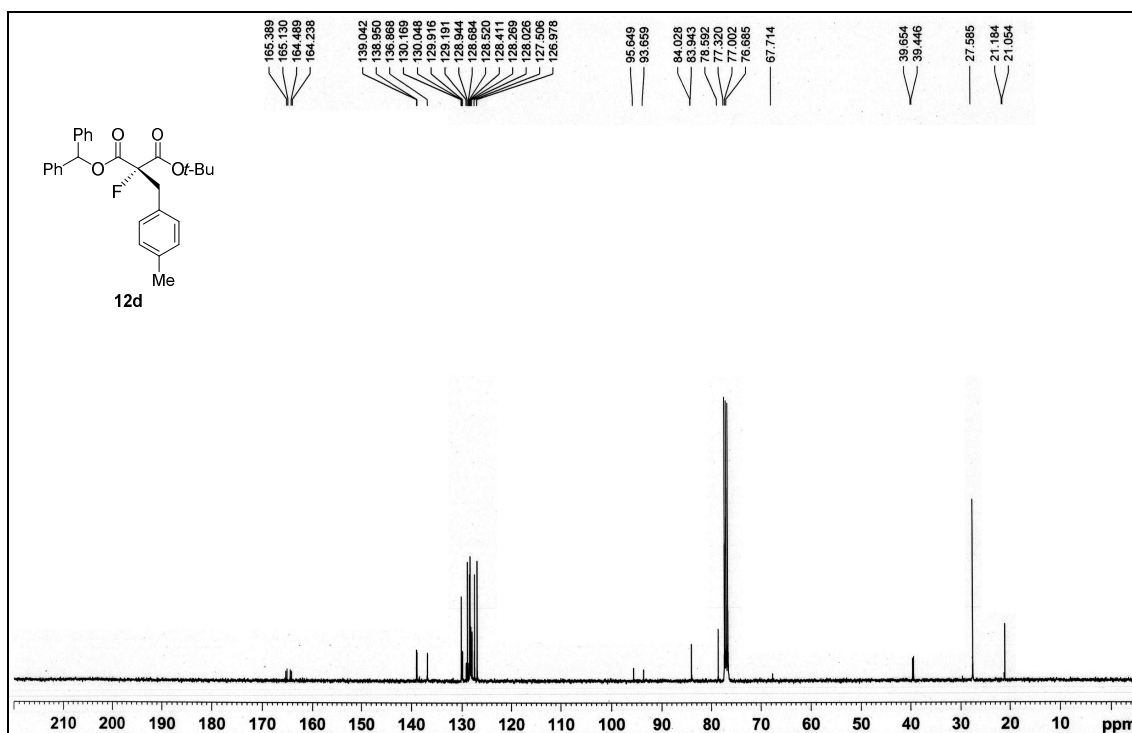

<sup>1</sup>H-NMR of compound **12e** (300 MHz)

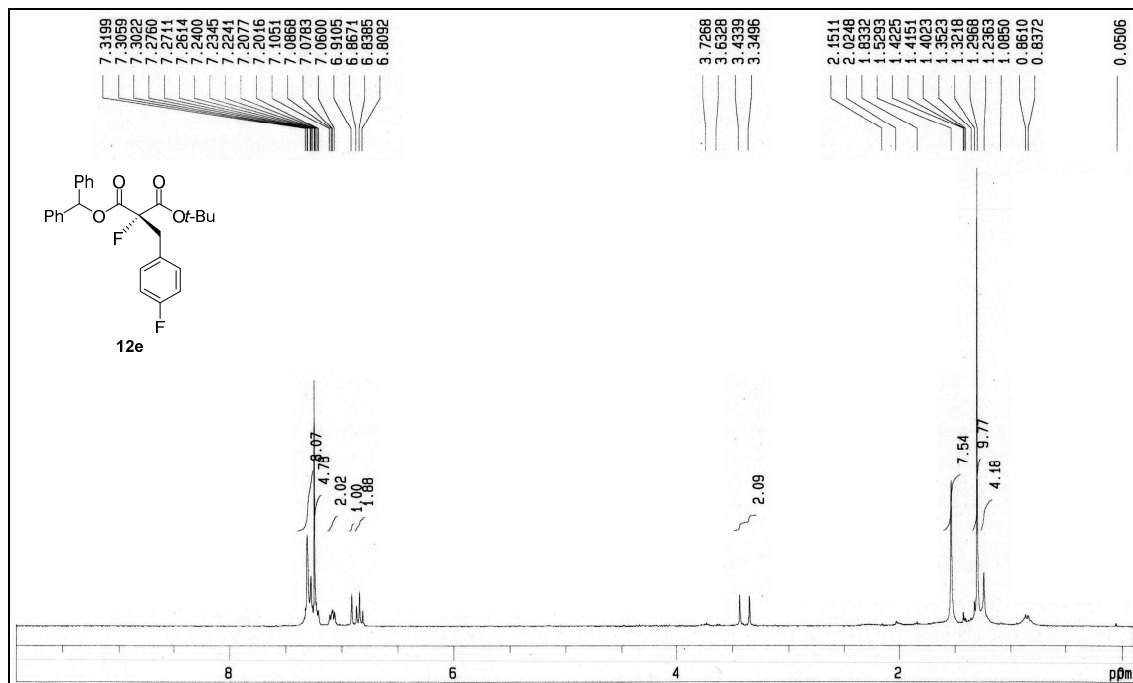

<sup>13</sup>C-NMR of compound **12e** (100 MHz)

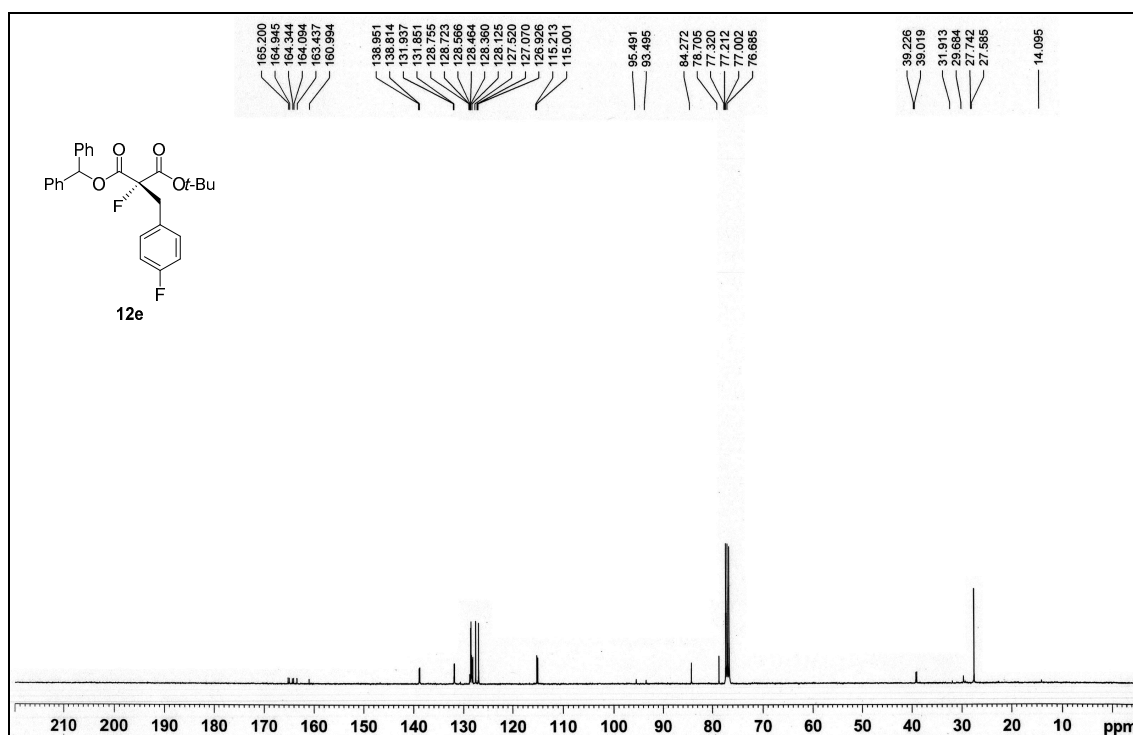

$^1\text{H}$ -NMR of compound **12f** (300 MHz)

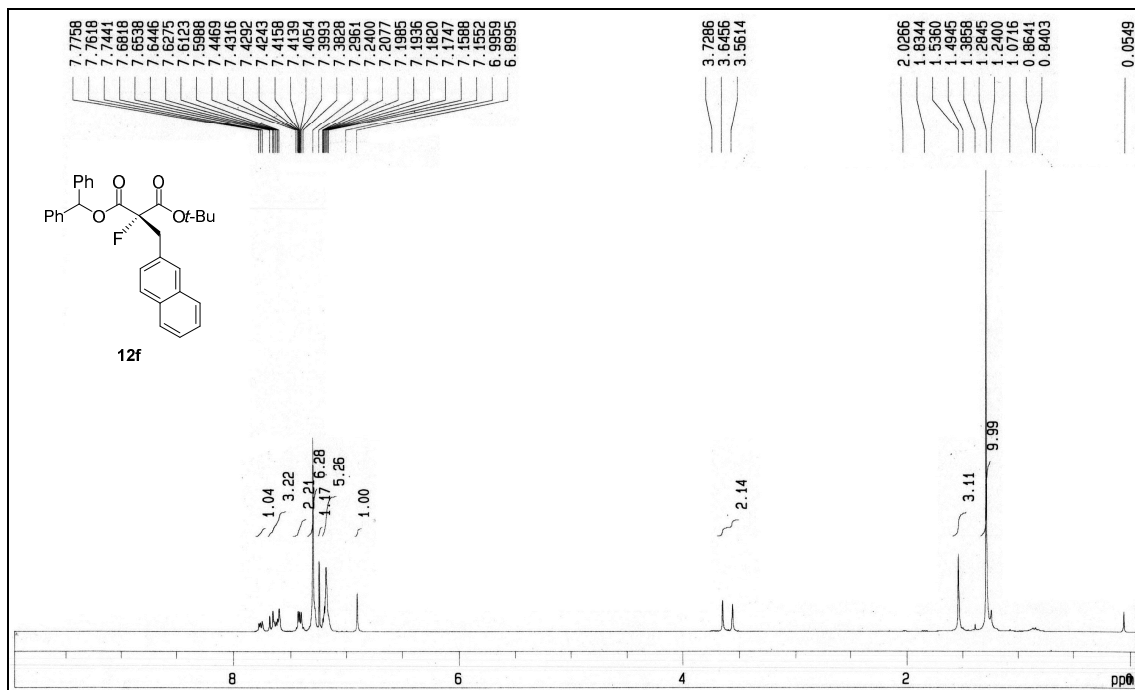

$^{13}\text{C}$ -NMR of compound **12f** (100 MHz)

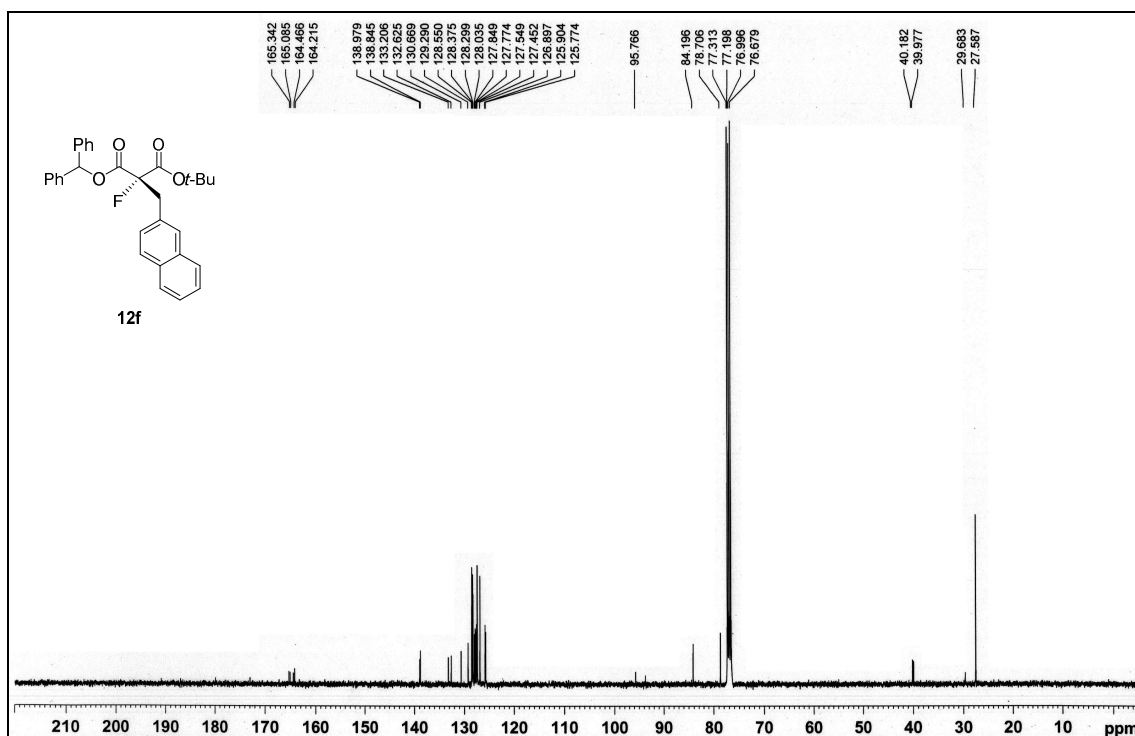

$^1\text{H}$ -NMR of compound **17** (300 MHz)

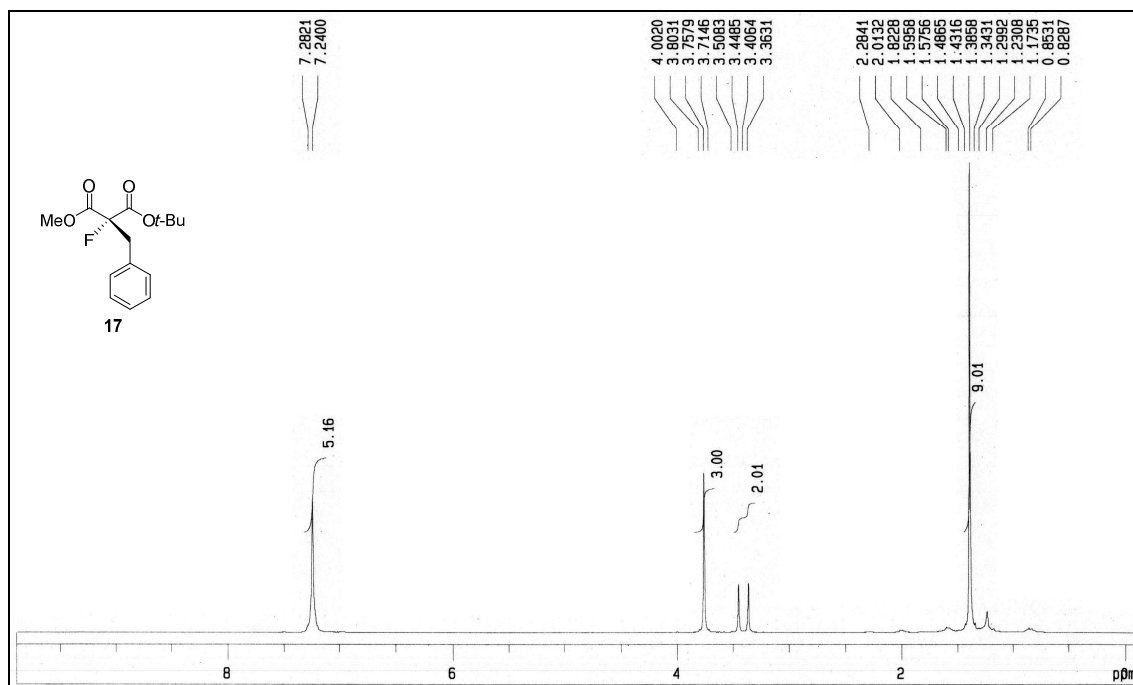

$^{13}\text{C}$ -NMR of compound **17** (100 MHz)

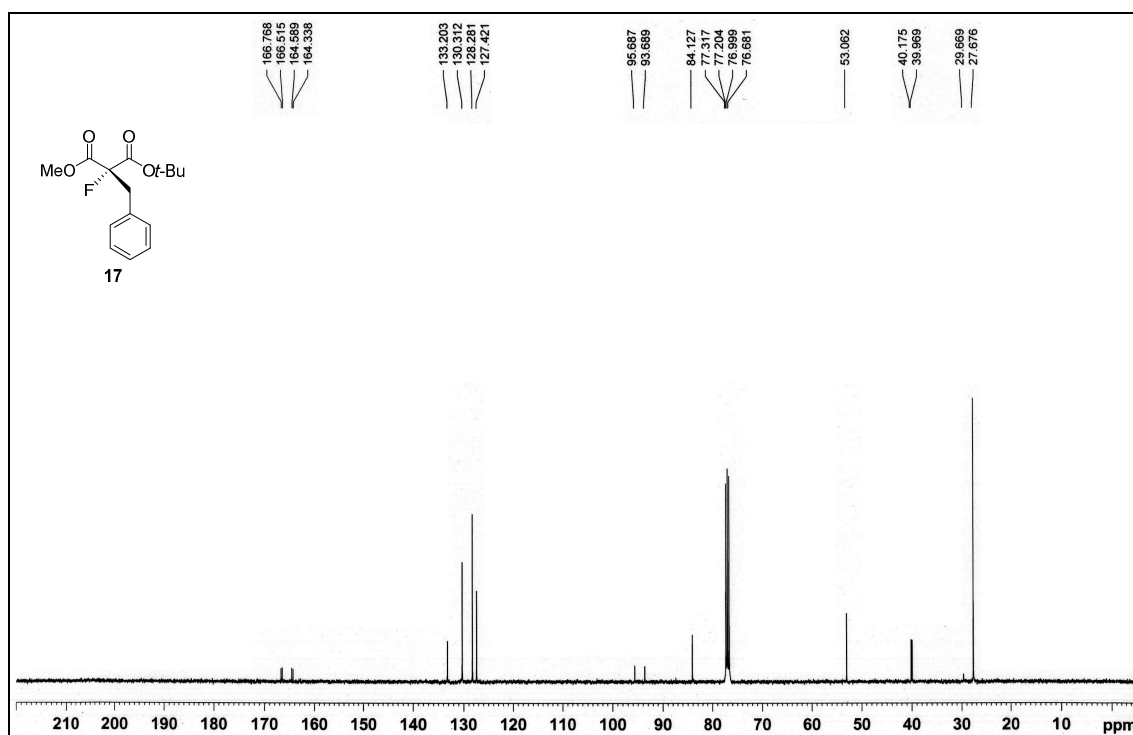

<sup>1</sup>H-NMR of compound **18** (300 MHz)

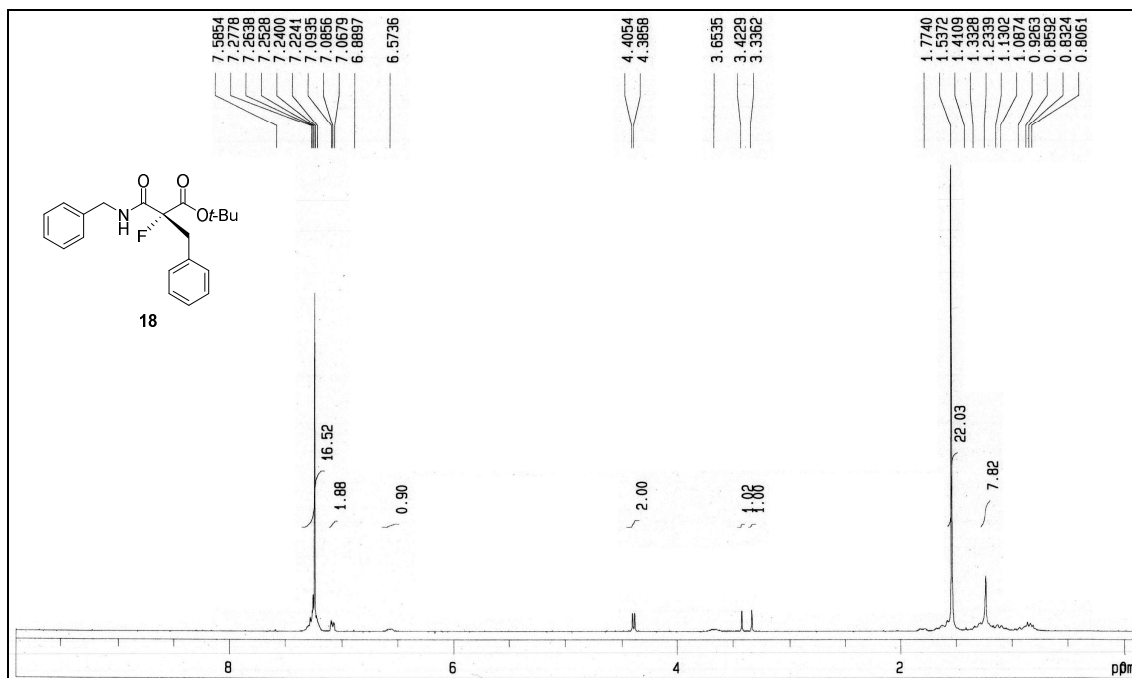

<sup>13</sup>C-NMR of compound **18** (75 MHz)

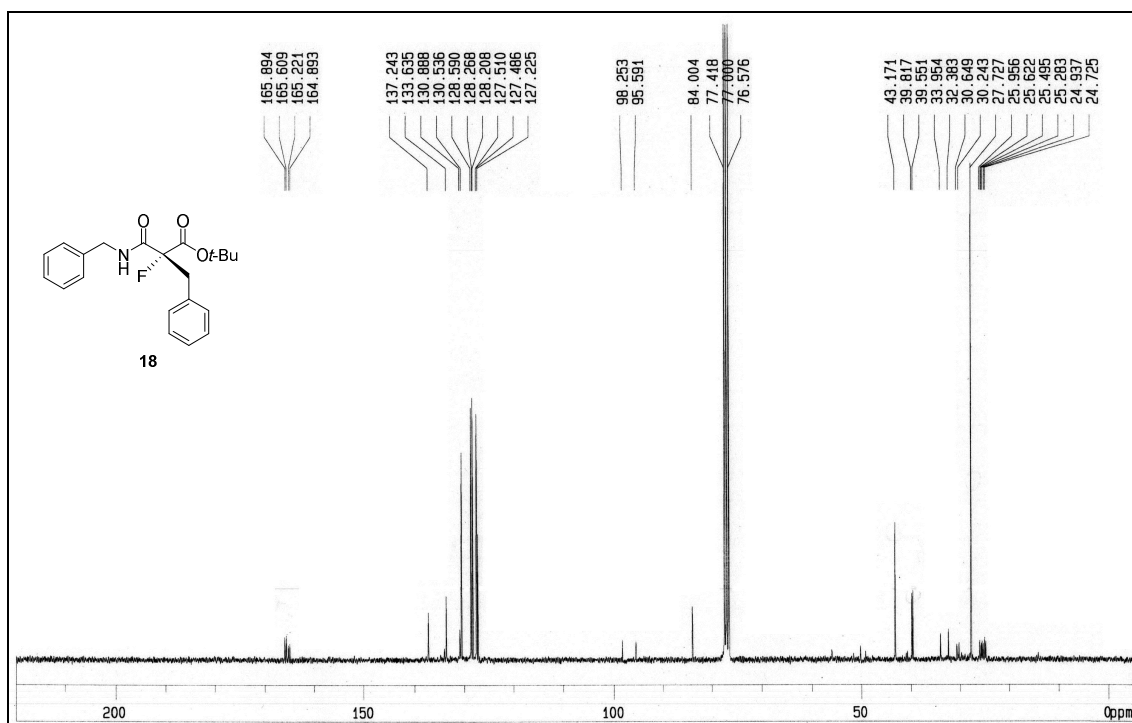



<sup>1</sup>H-NMR of compound **19** (300 MHz)

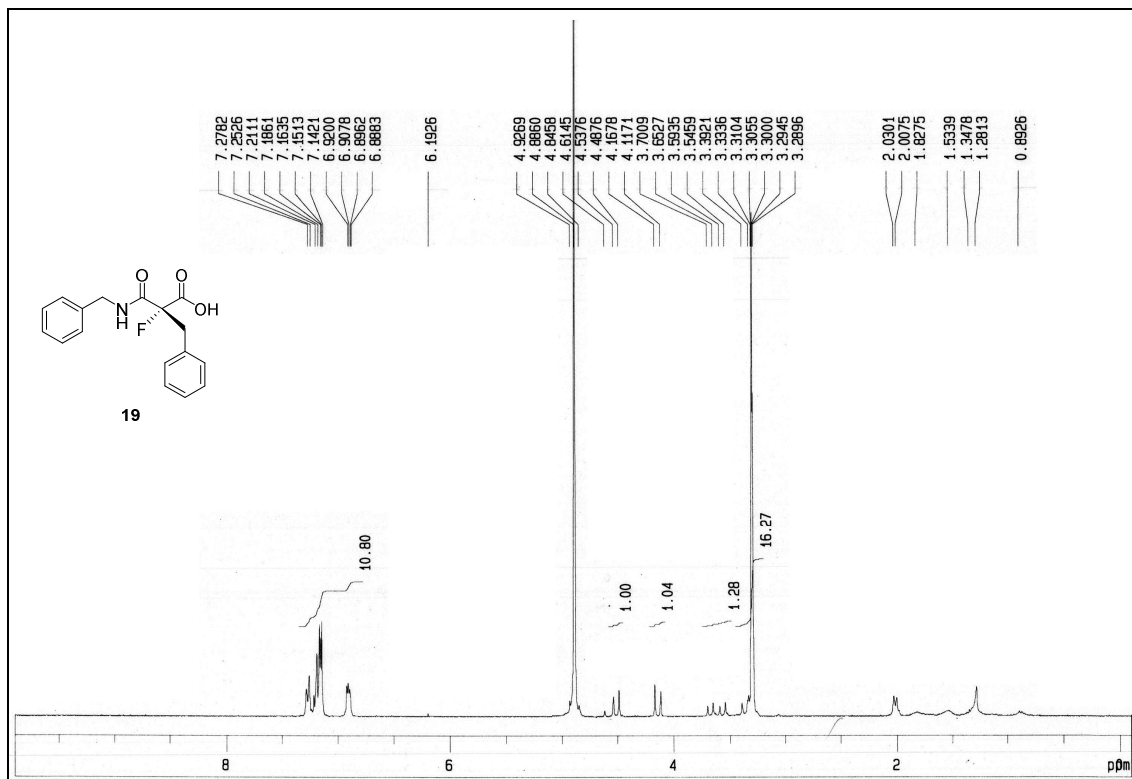

<sup>13</sup>C-NMR of compound **19** (75 MHz)

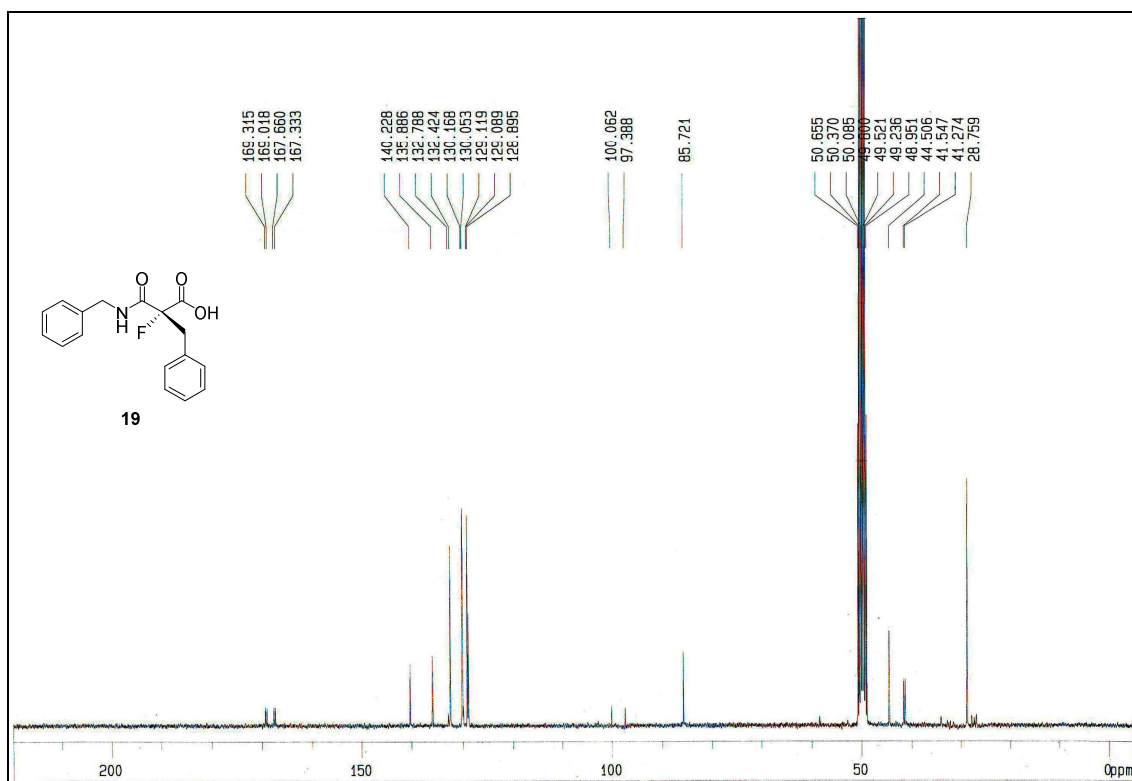

$^1\text{H}$ -NMR of Welch's (*R,R*)-HIV-1 protease inhibitor(**20**) (300 MHz)

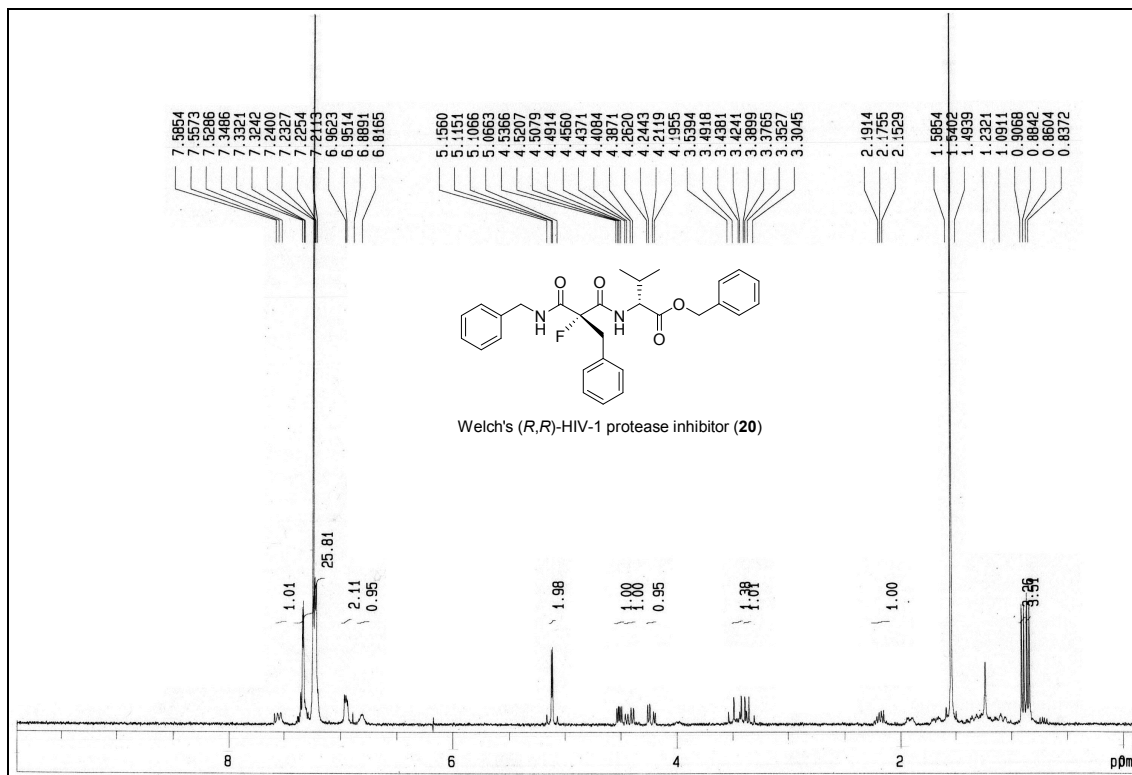

$^{13}\text{C}$ -NMR of Welch's (*R,R*)-HIV-1 protease inhibitor(**20**) (125 MHz)

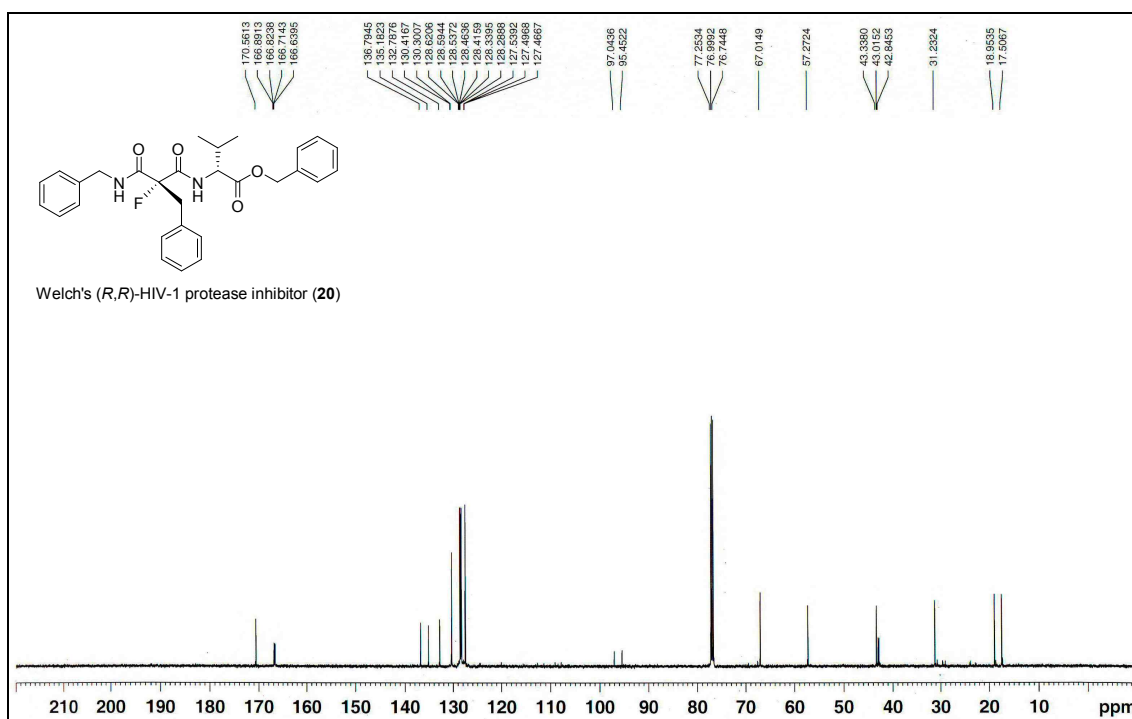



## Chiral HPLC analysis

### HPLC chart of compound **12a**

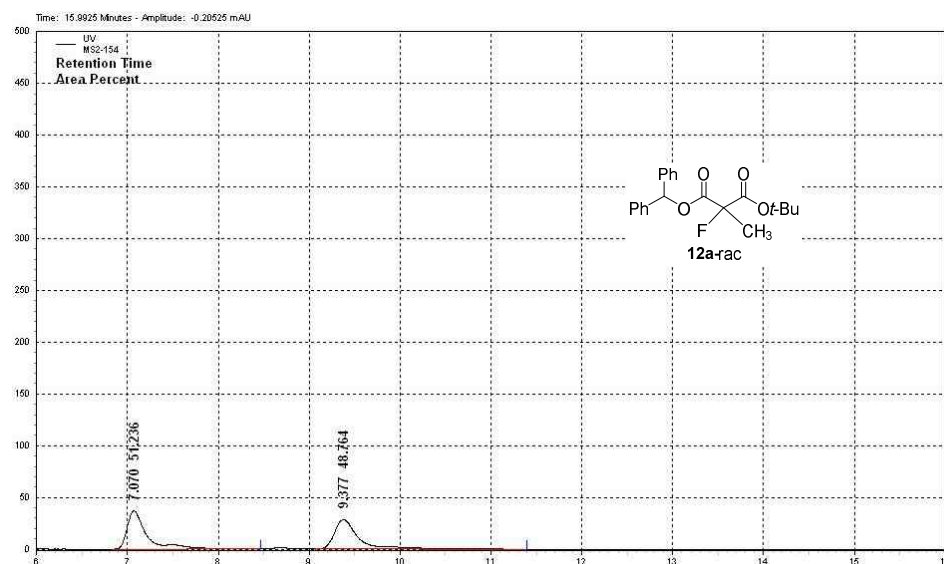

| UV Results |                |         |              |                   |
|------------|----------------|---------|--------------|-------------------|
| Name       | Retention Time | Area    | Area Percent | Integration Codes |
|            | 7.070          | 2242448 | 51.236       | IB                |
|            | 9.377          | 2134278 | 48.764       | BI                |

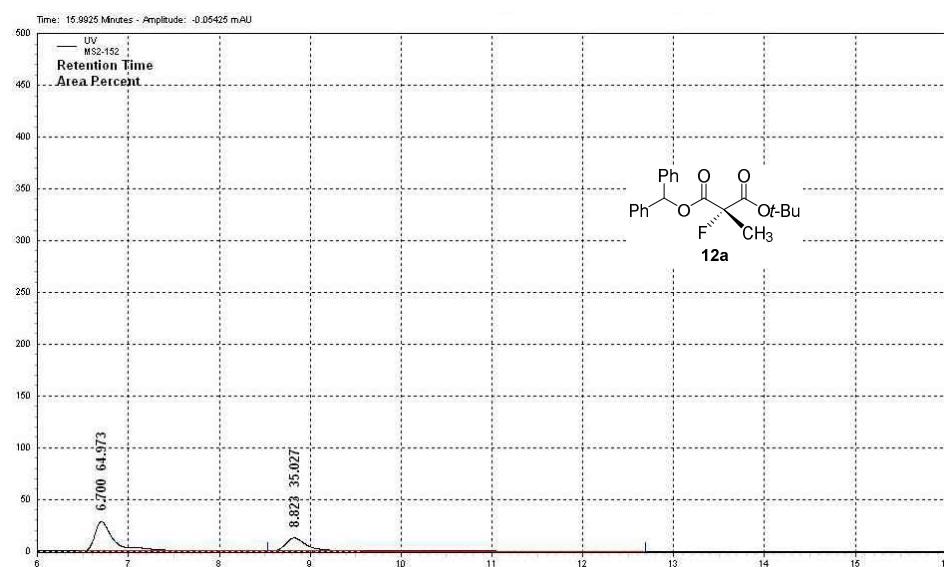

| UV Results |                |         |              |                   |
|------------|----------------|---------|--------------|-------------------|
| Name       | Retention Time | Area    | Area Percent | Integration Codes |
|            | 6.700          | 1790266 | 64.973       | BV                |
|            | 8.823          | 965117  | 35.027       | VI                |

# HPLC chart of compound **12b**

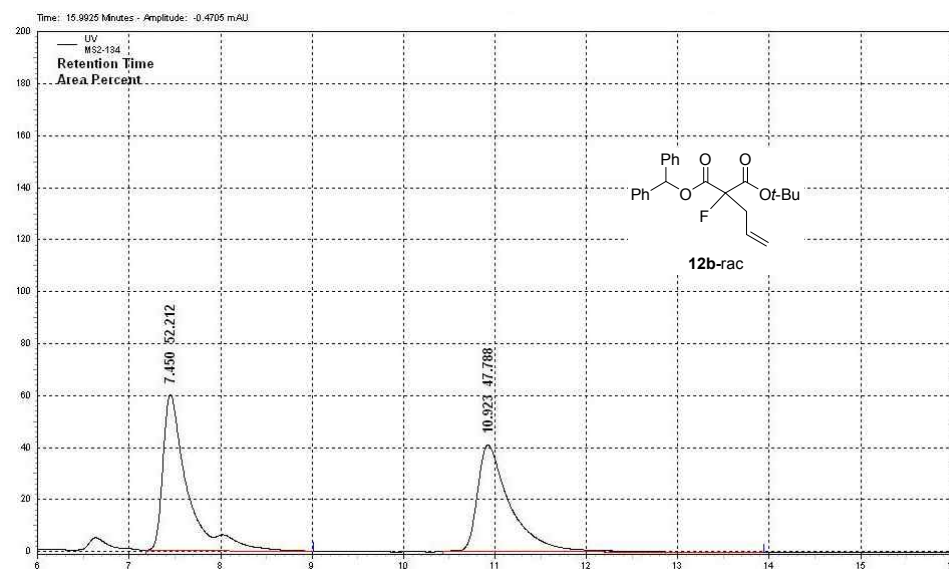

## UV Results

| Name | Retention Time | Area    | Area Percent | Integration Codes |
|------|----------------|---------|--------------|-------------------|
|      | 7.450          | 4452217 | 52.212       | II                |
|      | 10.923         | 4074953 | 47.788       | II                |

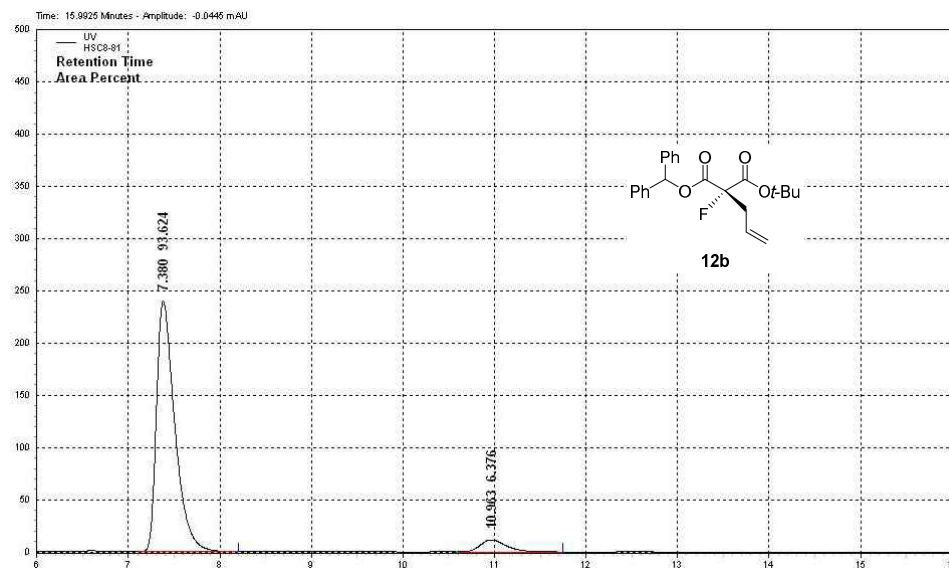

## UV Results

| Name | Retention Time | Area     | Area Percent | Integration Codes |
|------|----------------|----------|--------------|-------------------|
|      | 7.380          | 13360006 | 93.624       | BB                |
|      | 10.963         | 909885   | 6.376        | BI                |

HPLC chart of compound **14b**

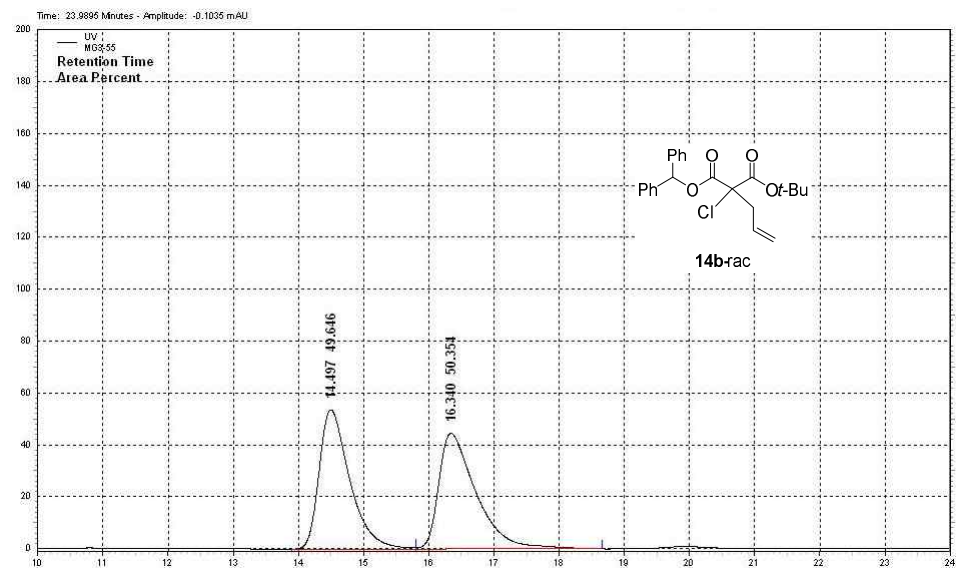

| UV Results |                |         |              |                   |
|------------|----------------|---------|--------------|-------------------|
| Name       | Retention Time | Area    | Area Percent | Integration Codes |
|            | 14.497         | 6995194 | 49.646       | BV                |
|            | 16.340         | 7094845 | 50.354       | VI                |

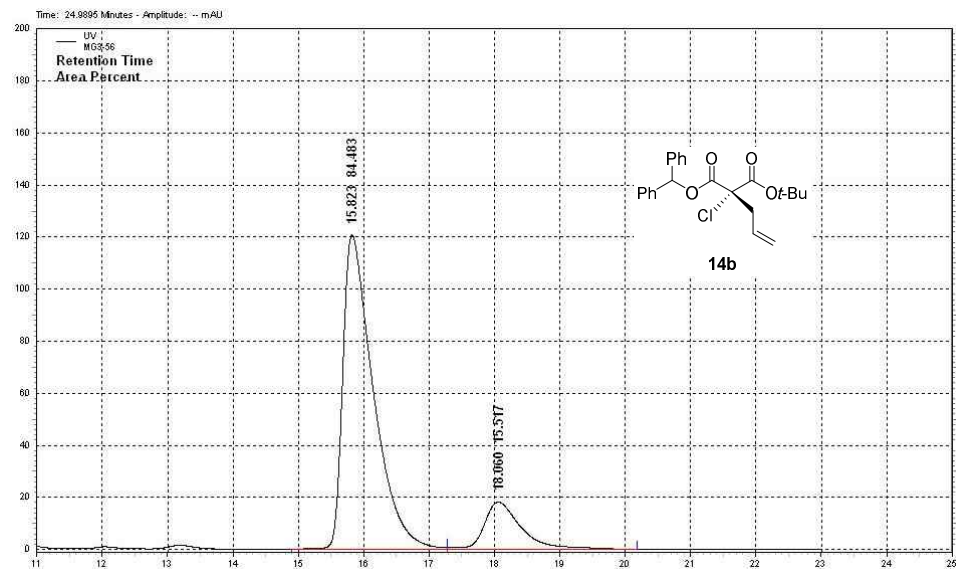

| UV Results |                |          |              |                   |
|------------|----------------|----------|--------------|-------------------|
| Name       | Retention Time | Area     | Area Percent | Integration Codes |
|            | 15.823         | 15665459 | 84.483       | BV                |
|            | 18.060         | 2877231  | 15.517       | VI                |

# HPLC chart of compound **15b**

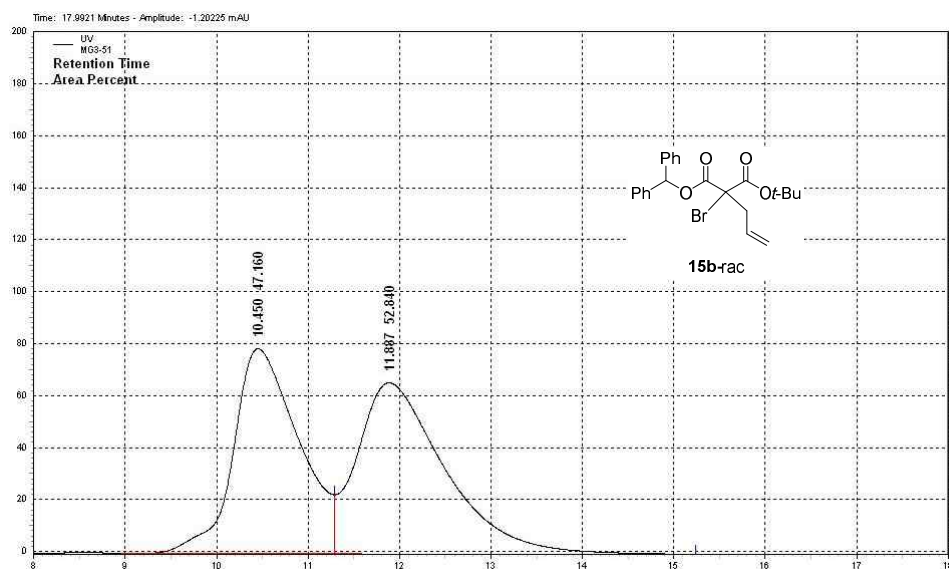

## UV Results

| Name | Retention Time | Area     | Area Percent | Integration Codes |
|------|----------------|----------|--------------|-------------------|
|      | 10.450         | 15673974 | 47.160       | BV                |
|      | 11.887         | 17561576 | 52.840       | VI                |

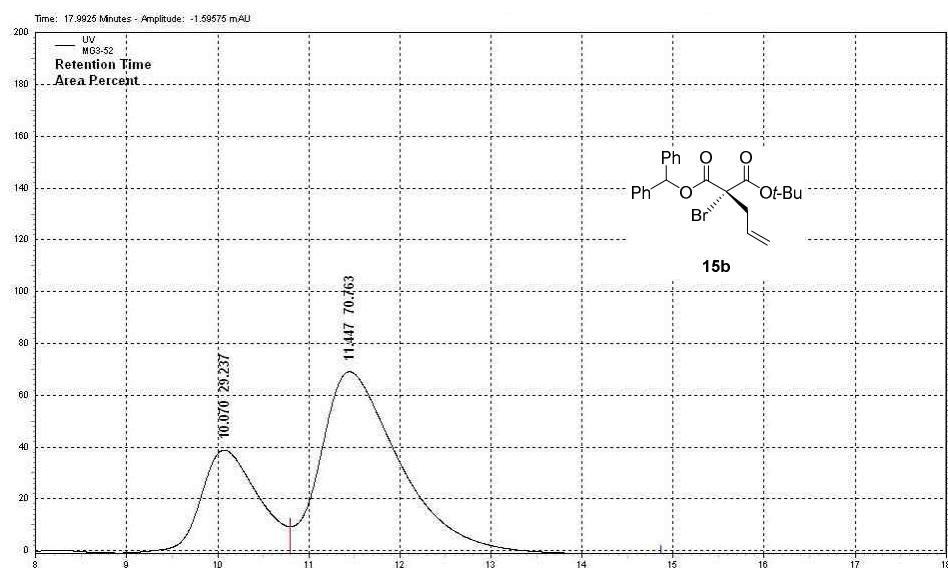

## UV Results

| Name | Retention Time | Area     | Area Percent | Integration Codes |
|------|----------------|----------|--------------|-------------------|
|      | 10.070         | 6999001  | 29.237       | BV                |
|      | 11.447         | 16939541 | 70.763       | VB                |

# HPLC chart of compound **12c**

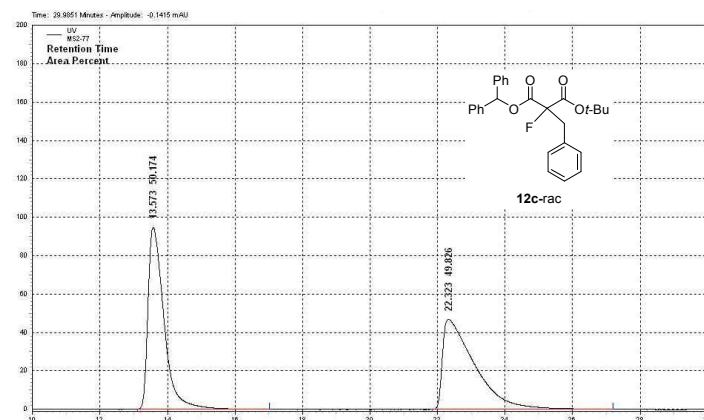

| UV Results<br>Name | Retention Time | Area     | Area Percent | Integration Codes |
|--------------------|----------------|----------|--------------|-------------------|
|                    | 13.573         | 12464418 | 50.174       | II                |
|                    | 22.323         | 12378134 | 49.826       | II                |

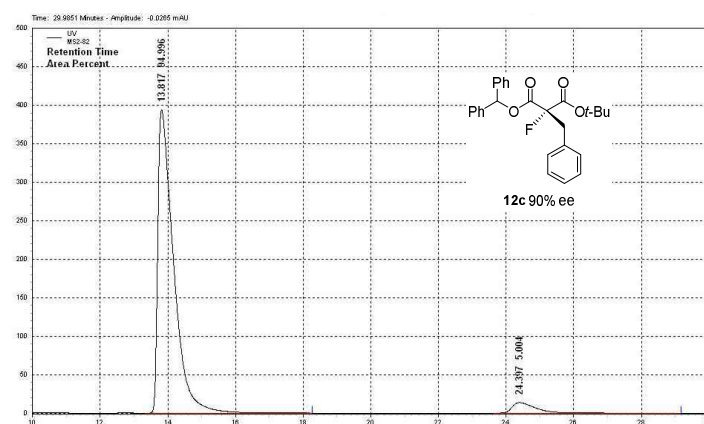

| UV Results<br>Name | Retention Time | Area     | Area Percent | Integration Codes |
|--------------------|----------------|----------|--------------|-------------------|
|                    | 13.817         | 50827775 | 94.996       | BI                |
|                    | 24.397         | 2677273  | 5.004        | BB                |

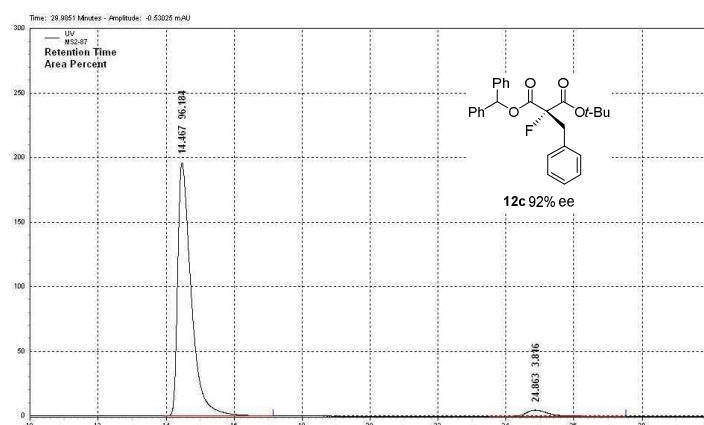

| UV Results<br>Name | Retention Time | Area     | Area Percent | Integration Codes |
|--------------------|----------------|----------|--------------|-------------------|
|                    | 14.467         | 21659572 | 96.184       | BI                |
|                    | 24.863         | 859233   | 3.816        | BB                |

# HPLC chart of compound **14c**

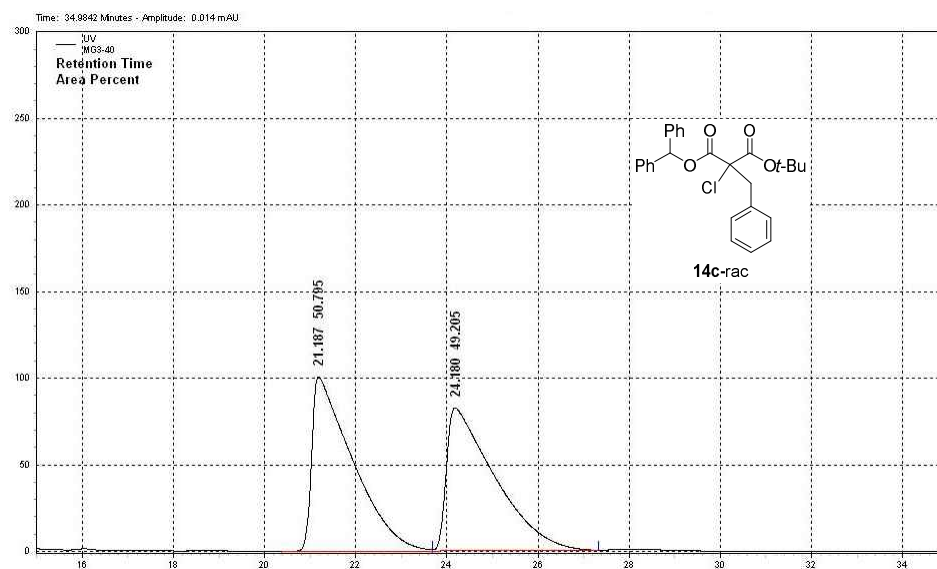

## UV Results

| Name | Retention Time | Area     | Area Percent | Integration Codes |
|------|----------------|----------|--------------|-------------------|
|      | 21.187         | 24877957 | 50.795       | IV                |
|      | 24.180         | 24099305 | 49.205       | VI                |

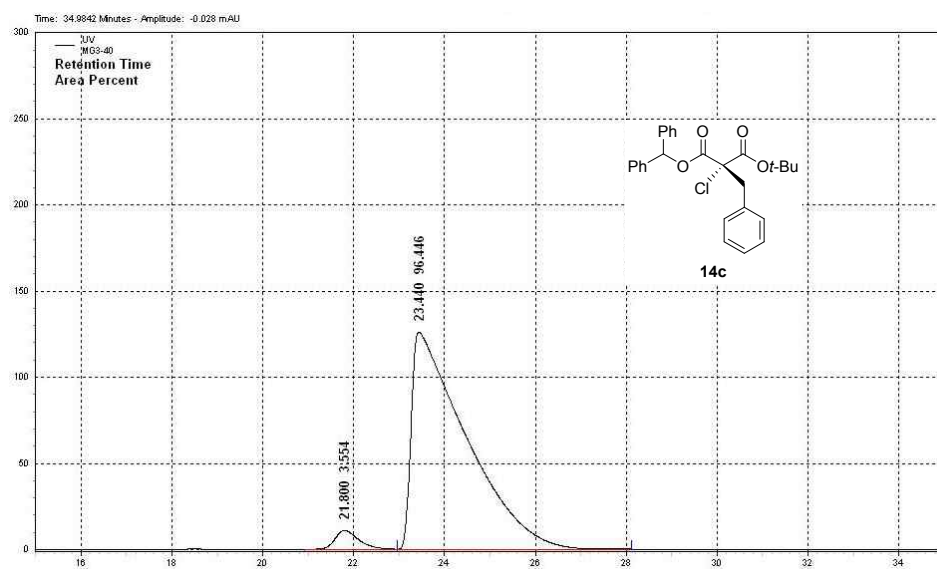

## UV Results

| Name | Retention Time | Area     | Area Percent | Integration Codes |
|------|----------------|----------|--------------|-------------------|
|      | 21.800         | 1555175  | 3.554        | BB                |
|      | 23.440         | 42198622 | 96.446       | BI                |



# HPLC chart of compound **15c**

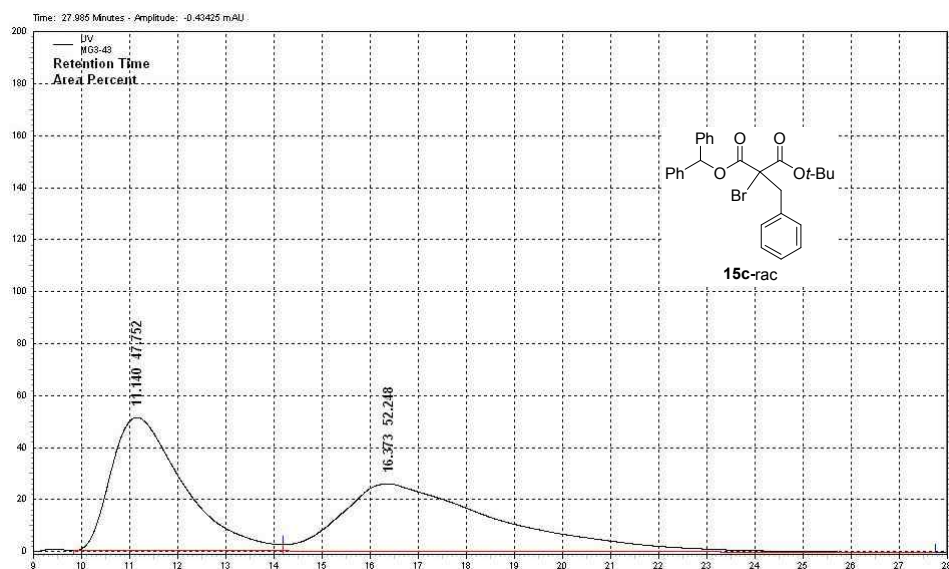

## UV Results

| Name | Retention Time | Area     | Area Percent | Integration Codes |
|------|----------------|----------|--------------|-------------------|
|      | 11.140         | 21549447 | 47.752       | IV                |
|      | 16.373         | 23578299 | 52.248       | VE                |

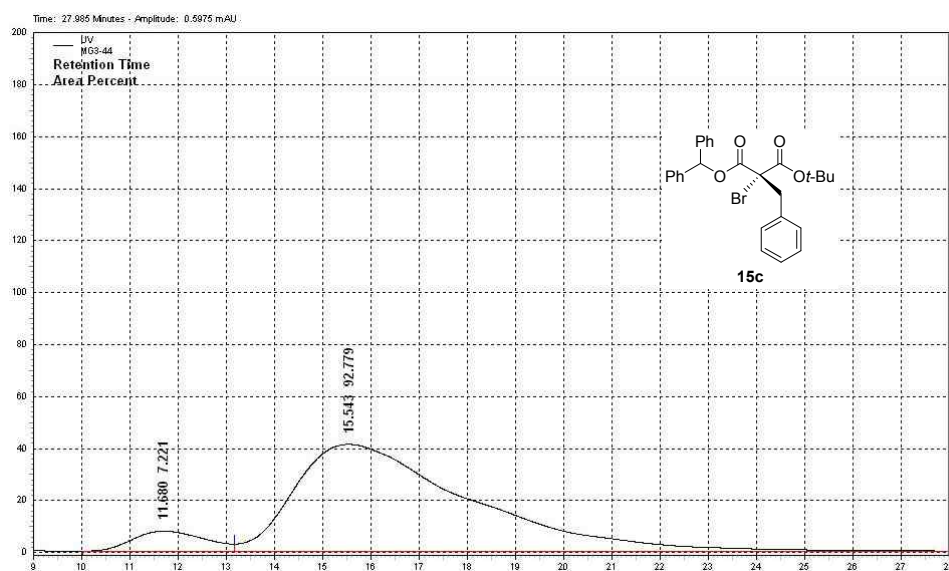

## UV Results

| Name | Retention Time | Area     | Area Percent | Integration Codes |
|------|----------------|----------|--------------|-------------------|
|      | 11.680         | 3190661  | 7.221        | BV                |
|      | 15.543         | 40992902 | 92.779       | VB                |

# HPLC chart of compound **12d**

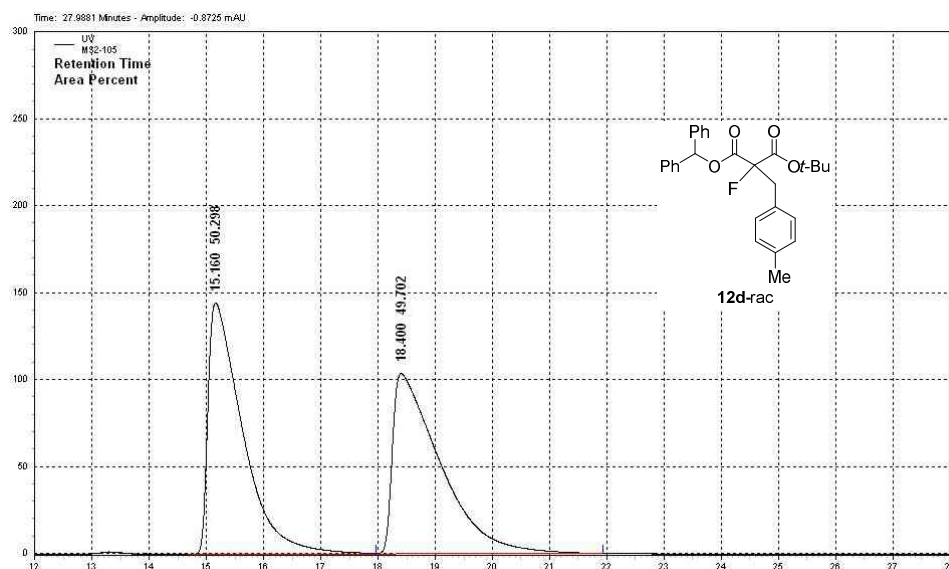

## UV Results

| Name | Retention Time | Area     | Area Percent | Integration Codes |
|------|----------------|----------|--------------|-------------------|
|      | 15.160         | 24231212 | 50.298       | BV                |
|      | 18.400         | 23944374 | 49.702       | VI                |

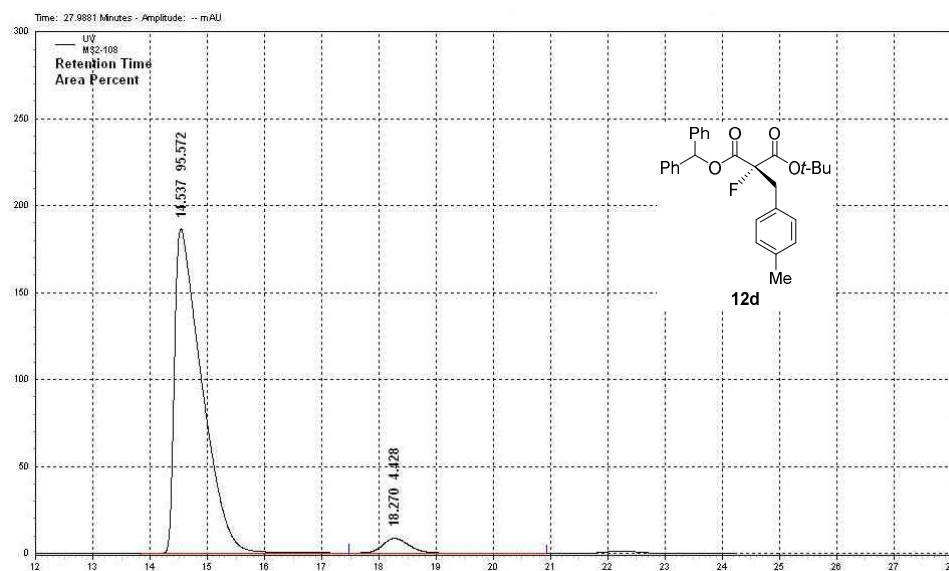

## UV Results

| Name | Retention Time | Area     | Area Percent | Integration Codes |
|------|----------------|----------|--------------|-------------------|
|      | 14.537         | 24732111 | 95.572       | BV                |
|      | 18.270         | 1145757  | 4.428        | VB                |



# HPLC chart of compound **12e**

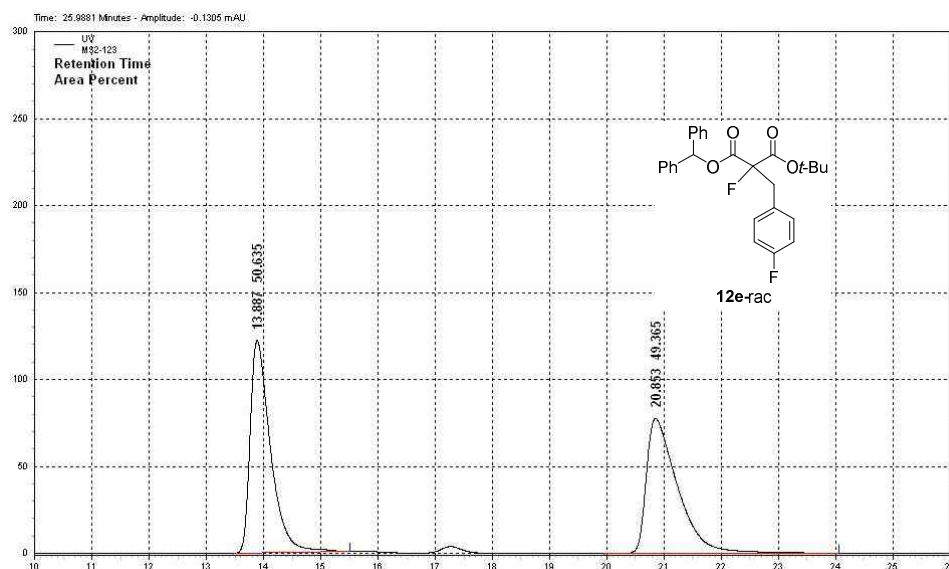

## UV Results

| Name | Retention Time | Area     | Area Percent | Integration Codes |
|------|----------------|----------|--------------|-------------------|
|      | 13.887         | 12059886 | 50.635       | BB                |
|      | 20.853         | 11757402 | 49.365       | BB                |

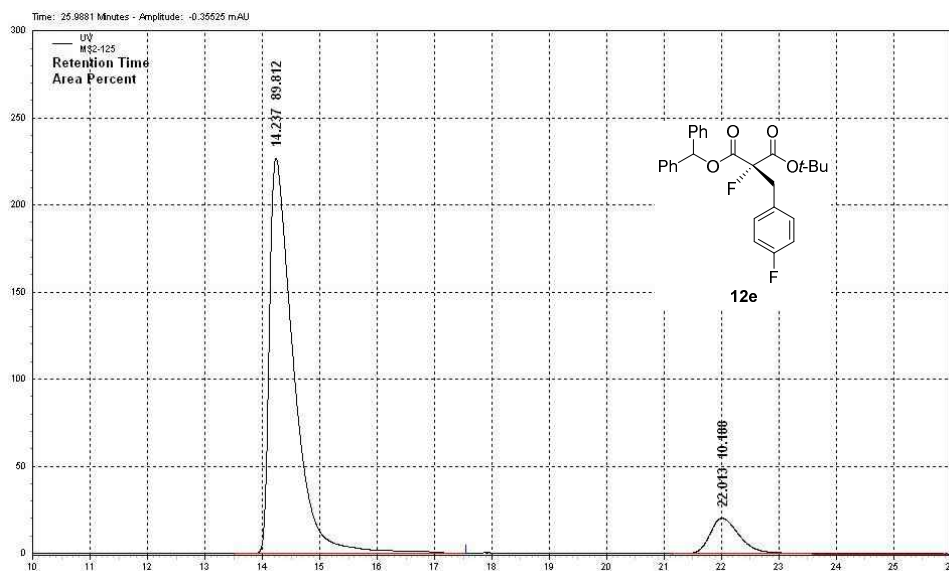

## UV Results

| Name | Retention Time | Area     | Area Percent | Integration Codes |
|------|----------------|----------|--------------|-------------------|
|      | 14.237         | 26301089 | 89.812       | BB                |
|      | 22.013         | 2983537  | 10.188       | BB                |

# HPLC chart of compound **12f**

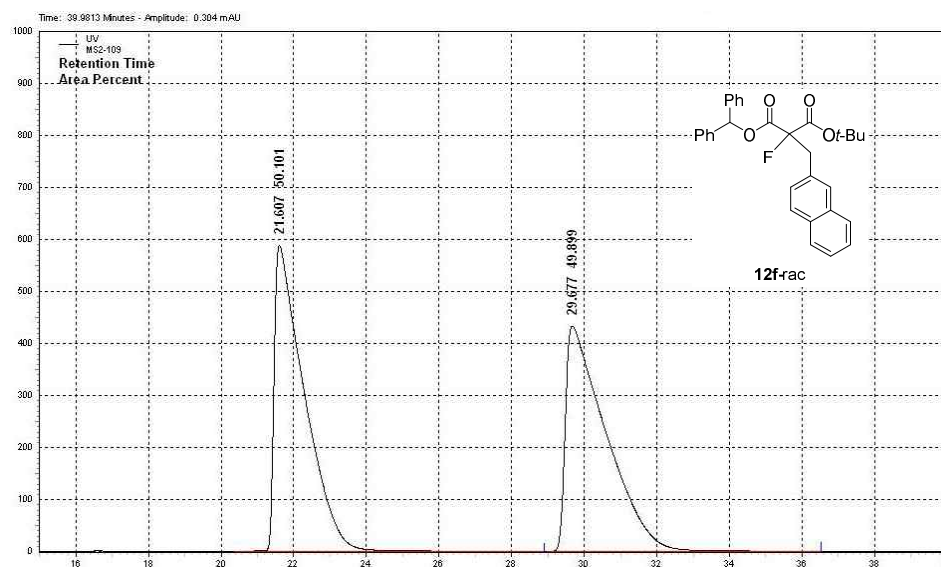

## UV Results

| Name | Retention Time | Area      | Area Percent | Integration Codes |
|------|----------------|-----------|--------------|-------------------|
|      | 21.607         | 135200285 | 50.101       | BB                |
|      | 29.677         | 134655599 | 49.899       | BB                |

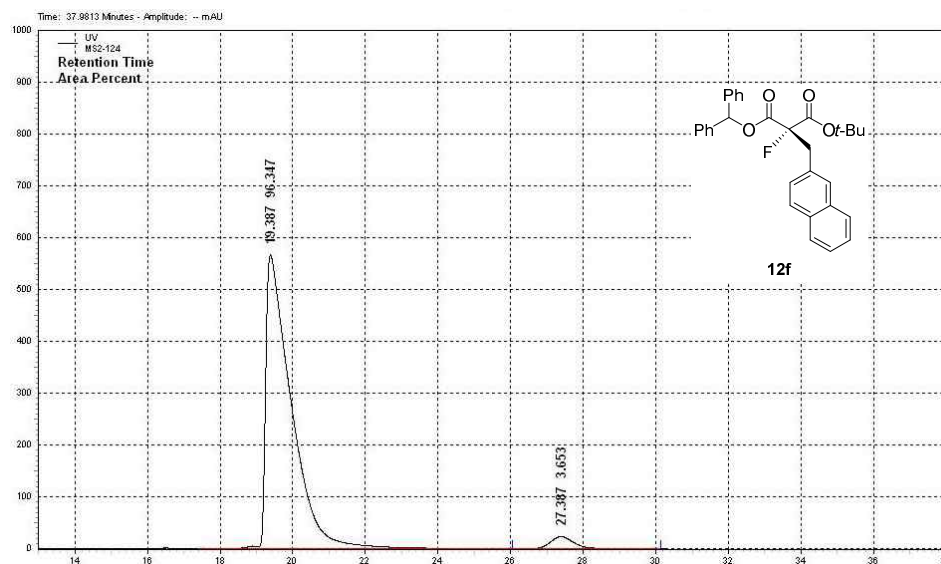

## UV Results

| Name | Retention Time | Area      | Area Percent | Integration Codes |
|------|----------------|-----------|--------------|-------------------|
|      | 19.387         | 110548264 | 96.347       | BV                |
|      | 27.387         | 4191319   | 3.653        | VE                |
